# Supplementary material for: β-Tetrachlorotetramethoxyporphycenes: positional effect of substituents on structure and photophysical properties
Source: Royal Society of Chemistry journal article supplement (doi:10.1039/c5cc03867g), 2015-01-01
Supplement: c5cc03867g1.pdf [file c5cc03867g1.pdf]

## Electronic Supplementary Information

### **$\beta$ -Tetrachlorotetramethoxyporphycenes: positional effect of substituents on structure and photophysical properties**

Anup Rana<sup>†</sup> and Pradeepta K. Panda\*<sup>†</sup>

<sup>†</sup> School of Chemistry and Advance Centre of Research in High Energy Materials (ACRHEM),  
University of Hyderabad, Hyderabad-500046, India.

E-mail: [pkpsc@uohyd.ernet.in](mailto:pkpsc@uohyd.ernet.in); [predeepta.panda@gmail.com](mailto:predeepta.panda@gmail.com)

#### **Table of Content**

|                                                      |         |
|------------------------------------------------------|---------|
| Instrumentation and reagents                         | S2-S4   |
| Reaction scheme                                      | S4      |
| Detailed synthetic procedure                         | S4-S11  |
| <sup>1</sup> H and <sup>13</sup> C NMR spectral data | S12-S33 |
| Crystallographic data                                | S28     |
| Photophysical data                                   | S37-S38 |
| Electrochemical data                                 | S39-S40 |
| Molecular orbital diagram                            | S41     |
| Gaussian calculation data                            | S41-46  |
| References                                           | S47     |

### Instrumentation and reagents:

NMR spectra were recorded on Bruker Avance-400 MHz and 500 MHz FT NMR spectrometer and for  $^1\text{H}$  NMR tetramethylsilane (TMS,  $\delta = 0$  ppm) in  $\text{CDCl}_3$  used as an internal standard at room temperature. For other deuterated solvents residual solvent peak were is used as reference in  $^1\text{H}$  NMR and for  $^{13}\text{C}$  NMR solvent peak was used as reference. LCMS were carried out by Shimadzu-LCMS-2010 mass spectrometer. Elemental analyses were obtained through Thermo Finnigan Flash EA 1112 analyzer. Mass spectral determinations were carried out by Bruker Maxis HRMS by ESI techniques. Melting points were determined by a Lab India MR-VIS<sup>+</sup> visual melting point apparatus and uncorrected. IR spectra were recorded on NICOLET 5700 FT-IR spectrometer. All UV-VIS spectra were recorded using Perkin Elmer Lambda-750 UV-VIS spectrometer. All fluorescence spectra were recorded in Fluorolog-3-221 spectrofluorometer equipped with Hamamatsu H10330-75 TE cooled NIR detector working at  $-60$  °C.

Fluorescence lifetime measurements were carried out using a time correlated single-photon counting (TCSPC) spectrometer (Horiba Jobin Yvon IBH). PicoBrite diode laser source ( $\lambda_{\text{exc}}$  375 nm) was used as the excitation source and an MCP photomultiplier (Hamamatsu R3809U-50) as the detector. The pulse repetition rate of the laser source was 10 MHz. The width of the instrument response function, which was limited by the fwhm of the exciting pulse, was around 55 ps. The lamp profile was recorded by placing a scatterer (dilute solution of Ludox in water) in place of the sample. The time resolved emission decay profiles were collected at steady state emission spectrum maxima's 630 nm and 680 nm. Decay curves were analyzed by nonlinear least-squares iteration procedure using IBH DAS6 (Version 2.2) decay analysis software. The quality of the fit was assessed by inspection of the  $\chi^2$  values and the distribution of the residuals.

The steady-state luminescence of singlet oxygen of porphycene **1a**, **1b** and their M(II) complex was measured by using a Fluorolog-3-221 spectrofluorometer equipped with Hamamatsu H10330-75 TE cooled NIR detector working at  $-60$  °C. Tetraphenylporphyrin (**H<sub>2</sub>TPP**) was taken as standard ( $\phi_{\Delta}$  0.7). All samples exhibit the emission bands ranging from 1240 to 1320 nm with the peak at about 1278 nm. The singlet oxygen quantum yields  $\phi_{\Delta}$  for all samples can be determined by using eq 1 (comparative actinometry method):<sup>S1</sup>

$$\phi_{\Delta} = \phi_{\Delta}^{std} \frac{I}{I_{std}} \frac{1 - 10^{-A^{std}}}{1 - 10^{-A}} \quad (1)$$

where  $\phi_{\Delta}^{std}$  (0.7) is the singlet oxygen quantum yield of **H<sub>2</sub>TPP** as the standard sample in aerated toluene,  $I$  and  $I_{std}$  refer to the singlet oxygen emission intensities at the peaks for the tested sample and **H<sub>2</sub>TPP**, respectively, and  $A$  and  $A^{std}$  stand for the ground-state absorbance of the tested sample and

**H<sub>2</sub>TPP** at the excited wavelength. Each sample is recorded for three times under identical condition and average value was taken to determine peak intensity.

Cyclic voltammetric (CV) and differential pulse voltammetric (DPV) measurements were done using Zahner Zennium Electrochemical Workstation and electrodes were purchased from CH Instruments Inc. All measurements were done in dichloromethane under flow of nitrogen and 0.1 M tetrabutylammoniumhexafluorophosphate (TBAPF<sub>6</sub>) used as a supporting electrolyte. Platinum disc as working electrode, platinum wire as counter electrode and Ag/AgCl in 1(M) KCl as reference electrode were used. Ferrocenium/Ferrocene, Fc<sup>+</sup>/Fc couple was used as external reference for calibration. The redox potentials were referenced vs. SCE. All cyclic voltammetric data were recorded at 50 mV/s scan rate.

Crystallographic data for **1a**, **1b**, **Zn1a.Py** and **Zn1b.Py** were collected on Oxford Gemini A Ultra diffractometer with dual source. Mo-K $\alpha$  ( $\lambda = 0.71073 \text{ \AA}$ ) and Cu-K $\alpha$  ( $\lambda = 1.54184 \text{ \AA}$ ) radiations were used for **Zn1a.Py** and **1a**, **1b**, **Zn1b.Py** respectively to collect the X-ray reflections of the crystal. Data reduction was performed using CrysAlisPro 171.33.55 software.<sup>S2</sup> Structures were solved and refined using Olex2-1.0 with anisotropic displacement parameters for non-H atoms. Hydrogen atoms on N were located from the Fourier map in all of the crystal structures. All C–H atoms were fixed geometrically. Empirical absorption correction was done using spherical harmonics, implemented in SCALE3 ABSPACK scaling algorithm. A check of the final CIF file using PLATON<sup>S3</sup> did not show any missed symmetry.

Crystallographic data for **6**, **8** and **12a** were collected on BRUKER SMART-APEX CCD diffractometer. Mo-K $\alpha$  ( $\lambda = 0.71073 \text{ \AA}$ ) radiation was used to collect X-ray reflections on the single crystal. Data reduction was performed using Bruker SAINT<sup>S4</sup> software. Intensities for absorption were corrected using SADABS<sup>S5</sup> and refined using SHELXL-97<sup>S6</sup> with anisotropic displacement parameters for non-H atoms. Hydrogen atoms on O and N were experimentally located in difference electron density maps. All C–H atoms were fixed geometrically using HFIX command in SHELX-TL. A check of the final CIF file using PLATON<sup>S3</sup> did not show any missed symmetry.

Compound **6**, **8** and **12a** were crystallized by slow evaporation of chloroform solution. The compound **1a** and **1b** crystallized by the slow evaporation of chloroform solution. The compound **Zn1a.Py** was crystallized by the slow evaporation of the solution of **Zn1a** in toluene in presence of pyridine. Similarly, compound **Zn1b.Py** was crystallized by the slow evaporation of the solution of **Zn1b** in benzene in presence of pyridine. Crystallographic data (excluding the structure factor) for structures **6**, **8**, **12a**, **1a**, **1b**, **Zn1a** and **Zn1b** in this paper have been deposited in the Cambridge Crystallographic Data Centre as supplementary publication number CCDC 1062094-1062100. Copies of these data can be obtained free of

charge on application to CCDC, 12 Union Road, Cambridge CB2 1EZ, UK (Fax: +44(0)-1223-336033 or e-mail: [deposit@ccdc.cam.ac.uk](mailto:deposit@ccdc.cam.ac.uk)) or via [www.ccdc.cam.ac.uk/data\\_request/cif](http://www.ccdc.cam.ac.uk/data_request/cif).

All DFT calculations were done in Gaussian09 software by using B3LYP method 6-31+G basis set.<sup>S7</sup>

### Reaction Scheme:

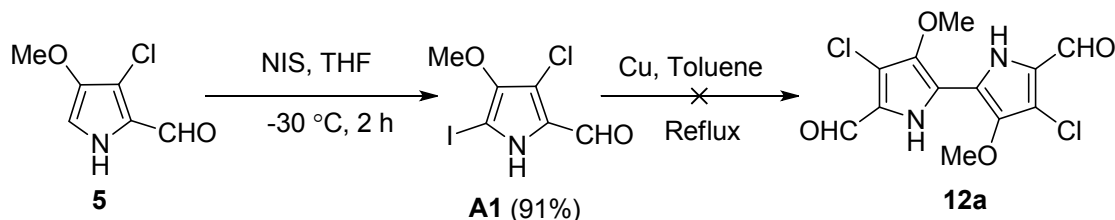

**Scheme S1:** Ullmann coupling protocol towards the synthesis of bipyrrole dialdehyde **12a**.

### Detailed reaction procedure:

#### Synthesis of 3-chloro-5-iodo-4-methoxypyrrole-2-aldehyde (**A1**):

3-Chloro-4-methoxypyrrole-2-aldehyde (**5**) (3 g, 18.8 mmol) was taken in THF (75 mL) under nitrogen atmosphere. Then, N-iodosuccinimide (4.44 g, 19.7 mmol) was added at -30 °C and reaction mixture was allowed to run at that temperature for 2 h. After completion of reaction, reaction mixture was quenched by addition of sodium bicarbonate solution, organic layer was separated and aqueous layer was extracted with diethyl ether. The combined organic layer was washed with aqueous sodium thiosulphate followed by brine solution and passed through anhydrous Na<sub>2</sub>SO<sub>4</sub> and evaporated to dryness under reduced pressure. Crude product was purified by silica gel column using EtOAc/hexane (1:9) as eluent to obtain **A1** (4.89 g) as crystalline white solid. Yield: 91%; m.p: 115 °C; IR (KBr):  $\nu$  (cm<sup>-1</sup>) 3189, 1647; <sup>1</sup>H NMR (CDCl<sub>3</sub>, 400 MHz),  $\delta$  (ppm): 9.78 (br s, 1H), 9.39 (s, 1H), 3.90 (s, 3H); <sup>13</sup>C NMR (CDCl<sub>3</sub>, 100 MHz),  $\delta$  (ppm): 175.96, 147.53, 129.96, 114.73, 70.99, 62.37; HRMS (ESI<sup>+</sup>): m/z: Calcd for C<sub>6</sub>H<sub>6</sub>ClINO<sub>2</sub> (M+H<sup>+</sup>): 285.9126; found: 285.9130.

#### Synthesis of 3-chloro-4-methoxypyrrole-2-nitrile (**7**):

3-Chloro-4-methoxypyrrole-2-aldehyde (**5**) (3 g, 18.81 mmol) and triethylamine (7.9 mL, 56.40 mmol) were taken in dry DCE (150 mL) under nitrogen. Hydroxylamine hydrochloride (1.57 g, 22.57 mmol) was added to the reaction mixture and stirred at 60 °C for 2 h. Then, phthalic anhydride (5.57 g, 37.62 mmol) was added in small portion wise and allow the reaction to stirred at reflux condition for 24 h. After reaction is over, allow the reaction mixture to reach to room temperature and washed twice with saturated

aqueous NaHCO<sub>3</sub> to remove phthalic acid. Aqueous layer was extracted three times with DCM (~150 ml × 3), combined organic layer was passed through anhydrous Na<sub>2</sub>SO<sub>4</sub> and evaporated under reduced pressure to dryness. Crude product was washed with DCM, filtered, washed with DCM until filtrate became colorless, leaving entitled product **7** as white crystalline solid. Additional amount of compound obtained by purifying filtrate by silica gel column chromatography using EtOAc/hexane (3:7) as eluent gives entitled compound (2.46 g, combined yield). Yield: 84%. m.p: 209.8 °C; IR (neat):  $\nu$  (cm<sup>-1</sup>) 3299, 3122, 2217; <sup>1</sup>H NMR (400 MHz, DMSO-d<sub>6</sub>),  $\delta$  (ppm): 12.27 (br s, 1H), 7.00 (s, 1H), 3.71 (s, 3H); <sup>13</sup>C NMR (100 MHz, DMSO-d<sub>6</sub>),  $\delta$  (ppm): 143.67, 112.64, 108.47, 108.00, 96.57, 58.48; HRMS (ESI+): m/z: calculated for C<sub>6</sub>H<sub>6</sub>N<sub>2</sub>OCl (M+H<sup>+</sup>): 157.0163; found: 157.0177; Elemental analysis Calcd for C<sub>5</sub>H<sub>5</sub>N<sub>2</sub>OCl: C, 46.03; H, 3.22; N, 17.89. Found: C, 46.12; H, 3.28; N, 17.81.

#### **Synthesis of 3-chloro-5-formyl-4-methoxypyrrole-2-nitrile (8):**

3-Chloro-4-methoxypyrrole-2-nitrile (**7**) (2 g, 12.77 mmol) was taken in DCE (140 mL) and DMF (9 mL) under nitrogen and reaction mixture was allowed to reflux to dissolve **7** completely. Under reflux condition POCl<sub>3</sub> (3.6 mL, 38.31 mmol) was added drop wise and stirred under reflux condition for 1 h. Then reaction mixture was cooled on ice bath and NaOAc (15.71 g, 0.19 mole) in 100 mL water added carefully and refluxed the reaction mixture for additional 2 h. After cooling the reaction mixture to room temperature organic layer was separated and water layer was extracted with DCM for three times. Combined organic layer was washed with aqueous NaHCO<sub>3</sub> solution. Then, organic layer was passed through anhydrous Na<sub>2</sub>SO<sub>4</sub> and evaporated to dryness. Crude reaction mixture was purified by silica gel column chromatography using EtOAc/Hexane (2:8) as eluent to obtain compound **8** (1.73 g) as white crystalline solid. Yield: 73%. m.p: 138.6 °C; IR (neat):  $\nu$  (cm<sup>-1</sup>) 3221, 2232, 1628; <sup>1</sup>H NMR (400 MHz, CDCl<sub>3</sub>),  $\delta$  (ppm): 10.62 (br s, 1H), 9.75 (s, 1H), 4.14 (s, 3H); <sup>13</sup>C NMR (100 MHz, CDCl<sub>3</sub>),  $\delta$  (ppm): 177.81, 150.03, 123.37, 112.85, 110.52, 106.35, 62.33; HRMS (ESI+): m/z: calculated for C<sub>7</sub>H<sub>6</sub>N<sub>2</sub>O<sub>2</sub>Cl (M+H<sup>+</sup>): 185.0112; found: 185.0109; Elemental analysis Calcd for C<sub>7</sub>H<sub>5</sub>N<sub>2</sub>O<sub>2</sub>Cl: C, 45.55; H, 2.73; N, 15.18. Found: C, 45.63; H, 2.71; N, 15.07.

#### **Synthesis of 4-chloro-5-formyl-3-methoxypyrrole-2-carboxylic acid (9):**

3-Chloro-5-formyl-4-methoxypyrrole-2-nitrile (**8**) (2 g, 10.84 mmol) and NaOH (4.33 g, 0.108 mole) were taken in H<sub>2</sub>O (60 mL) and refluxed the reaction mixture for 48 h. After completion of hydrolysis, reaction mixture was placed on an ice bath and acidified with conc. HCl to pH 1 resulted precipitation of compound as white solid. Precipitate was filtered, washed with ice water and dried under vacuum leaving entitled compound **9.4H<sub>2</sub>O** (2.47 g) as white powdery solid. Yield: 83%. m.p: 226.2 °C (dec); IR (neat):  $\nu$  (cm<sup>-1</sup>) 2948, 1718, 1688, 1643, 1614; <sup>1</sup>H NMR (400 MHz, DMSO-d<sub>6</sub>),  $\delta$  (ppm): 13.56 (br, s, 1H), 12.76

(br s, 1H), 9.69 (s, 3H), 3.93 (s, 3H);  $^{13}\text{C}$  NMR (100 MHz, DMSO- $d_6$ ),  $\delta$  (ppm): 179.26, 160.07, 148.01, 122.28, 121.82, 108.03, 62.23; HRMS (ESI+): m/z: calculated for  $\text{C}_7\text{H}_7\text{NO}_4\text{Cl}$  ( $\text{M}+\text{H}^+$ ): 204.0058; found: 204.0067; Elemental analysis Calcd for  $\text{C}_7\text{H}_6\text{NO}_4\text{Cl}\cdot 4\text{H}_2\text{O}$ : C, 30.50; H, 5.12; N, 5.08. Found: C, 30.68; H, 5.03; N, 5.16.

#### Synthesis of 4-chloro-5-iodo-3-methoxypyrrole-2-aldehyde (**10**):

Sodium bicarbonate (835 mg, 9.94 mmol) in water (15 mL) was added to 4-chloro-5-formyl-3-methoxypyrrole-2-carboxylic acid (**9**) (830 mg, 3.01 mmol) at room temperature under nitrogen. After **9** were completely dissolved DCE (40 mL) was added to the reaction mixture and temperature raised to 80 °C. Then, iodine (802 mg, 3.16 mmol) and KI (1.05 g, 6.32 mmol) in water (40 mL) was added drop wise over 30 min and allowed to stir for additional 1 h at same temperature. The reaction mixture was cooled to room temperature and excess sodium thiosulphate was added in small portion to remove excess iodine and stirred for 10 min. The reaction mixture was taken in a separatory funnel and organic layer was collected. Organic layer was passed through anhydrous  $\text{Na}_2\text{SO}_4$  and evaporated to dryness under reduce pressure. Crude reaction mixture was purified by silica gel column chromatography using EtOAc/hexane (2:8) as eluent gives entitled **10** (750 mg) as white crystalline solid. Yield: 87%. m.p: 128.6 °C; IR (neat):  $\nu$  ( $\text{cm}^{-1}$ ) 3381, 3221, 1616;  $^1\text{H}$  NMR (400 MHz,  $\text{CDCl}_3$ ),  $\delta$  (ppm): 9.87 (br s, 1H), 9.42 (s, 1H), 4.09 (s, 3H);  $^{13}\text{C}$  NMR (100 MHz,  $\text{CDCl}_3$ ),  $\delta$  (ppm): 175.19, 151.07, 125.28, 111.89, 81.00, 62.29; HRMS (ESI+): m/z: calculated for  $\text{C}_6\text{H}_5\text{NO}_2\text{ClNa}$  ( $\text{M}+\text{Na}^+$ ): 307.8946; found: 307.8944; Elemental analysis Calcd for  $\text{C}_6\text{H}_5\text{NO}_2\text{Cl}$ : C, 25.24; H, 1.77; N, 4.91. Found: C, 25.36; H, 1.71; N, 4.98.

#### Synthesis of 4-chloro-3-methoxypyrrole-2-aldehyde (**6**):

Activated Zinc (1.20 g), 4-chloro-5-iodo-3-methoxypyrrole-2-aldehyde (**10**) (1.75g, 6.13 mmol) and 5%Pd/C (490 mg) were taken in acetone/water (140/140 mL) under nitrogen and reaction mixture was allowed to stir vigorously at room temperature for 18 h. The reaction mixture was quenched with DCM (~150 mL), organic layer was separated and aqueous layer washed with DCM (~50 mL) for three times. Combined organic layer was passed through celite and washed with DCM for three times. Organic layer was passed through anhydrous  $\text{Na}_2\text{SO}_4$  and evaporated to dryness under reduce pressure. Crude reaction mixture was purified by silica gel column chromatography using EtOAc/hexane (3:7) as eluent gives entitled **6** (879 mg) as white crystalline solid. Yield: 90%. m.p: 133.4 °C; IR (neat):  $\nu$  ( $\text{cm}^{-1}$ ) 3077, 1621;  $^1\text{H}$  NMR (400 MHz,  $\text{CDCl}_3$ ),  $\delta$  (ppm): 9.62 (s, 1H), 9.39 (br s, 1H), 6.95 (d, 1H,  $J = 3.6$  Hz), 4.09 (s, 3H);  $^{13}\text{C}$  NMR (100 MHz,  $\text{CDCl}_3$ ),  $\delta$  (ppm): 176.63, 151.69, 123.54, 120.83, 104.46, 62.25; HRMS (ESI+): m/z: calculated for  $\text{C}_6\text{H}_5\text{NO}_2\text{Cl}$  ( $\text{M}+\text{H}^+$ ): 160.0160; found: 160.0160; Elemental analysis Calcd for  $\text{C}_6\text{H}_6\text{NO}_2\text{Cl}$ : C, 45.16; H, 3.79; N, 8.78. Found: C, 45.23; H, 3.84; N, 8.65.

### **General procedure for synthesis of ethyl 3-(3,4-disubstituted-pyrrol-2-yl)-2-cyanoacrylate (11):**

3-Chloro-4-methoxypyrrole-2-aldehyde (**5**) (2 g, 25.06 mmol) was taken in toluene (60 mL) under nitrogen. Subsequently, ethyl-2-cyanoacetate (2.9 mL, 27.57 mmol) and triethylamine (3.5 mL, 25.06 mmol) were added and allowed the reaction mixture to stir at reflux condition for 4 h. The reaction mixture was allowed to come to room temperature and kept at -20 °C for 2 h result the precipitation of compound as yellow fibrous solid. The reaction mixture was filtered and washed with cold hexane leaves entitled **11a** (3 g) as yellow fibrous solid.

### **Ethyl 3-(3-chloro-4-methoxypyrrol-2-yl)-2-cyanoacrylate (11a):**

Yield: 94%. m.p: 181.1 °C; IR (neat):  $\nu$  (cm<sup>-1</sup>) 3391, 2215, 1694; <sup>1</sup>H NMR (400 MHz, CDCl<sub>3</sub>),  $\delta$  (ppm): 9.47 (br s, 1H), 8.07 (s, 1H), 6.81 (d, 1H,  $J$  = 3.6 Hz), 4.35 (d, 2H,  $J$  = 7.2 Hz), 3.85 (s, 3H), 1.38 (t, 3H,  $J$  = 6.8 Hz); <sup>13</sup>C NMR (100 MHz, CDCl<sub>3</sub>),  $\delta$  (ppm): 162.97, 146.52, 138.40, 121.39, 118.60, 113.19, 110.84, 93.22, 62.40, 58.90, 14.36; HRMS (ESI+):  $m/z$ : calculated for C<sub>11</sub>H<sub>12</sub>N<sub>2</sub>O<sub>3</sub>Cl (M+H<sup>+</sup>): 277.0350; found: 277.0354; Elemental analysis Calcd for C<sub>11</sub>H<sub>11</sub>N<sub>2</sub>O<sub>3</sub>Cl: C, 51.88; H, 4.35; N, 11.00. Found: C, 51.76; H, 4.43; N, 10.85.

### **Ethyl 3-(4-chloro-3-methoxypyrrol-2-yl)-2-cyanoacrylate (11b):**

4-Chloro-3-methoxypyrrole-2-carbaldehyde (**6**) (850 mg, 5.33 mmol) was taken for reaction. After reaction was over, it was allowed to come to room temperature and kept at -20 °C for 2 h result the precipitation of compound. The reaction mixture was filtered and washed with cold hexane leaves entitled **11b** as reddish yellow solid. Filtrate was evaporated under reduce pressure and washed with methanol resulted another crop of compound and finally methanol washed part was purified by silica gel column chromatography by using EtOAc/hexane (2:8) as eluent resulted **11b** as yellow crystalline solid. Combined yield: 1.32 g (97%); m.p: 154.2 °C; IR (neat):  $\nu$  (cm<sup>-1</sup>) 3358, 2215, 1693; <sup>1</sup>H NMR (400 MHz, CDCl<sub>3</sub>),  $\delta$  (ppm): 9.46 (br s, 1H), 8.04 (s, 1H), 7.05 (d, 1H,  $J$  = 3.6 Hz), 4.33 (d, 2H,  $J$  = 6.8 Hz), 4.07 (s, 3H), 1.37 (t, 3H,  $J$  = 7.2 Hz); <sup>13</sup>C NMR (100 MHz, CDCl<sub>3</sub>),  $\delta$  (ppm): 163.46, 151.61, 137.71, 125.46, 119.05, 116.52, 105.37, 90.38, 62.16, 61.93, 14.41; HRMS (ESI+):  $m/z$ : calculated for C<sub>11</sub>H<sub>11</sub>N<sub>2</sub>O<sub>3</sub>ClNa (M+Na<sup>+</sup>): 277.0350; found: 277.0348; Elemental analysis Calcd for C<sub>11</sub>H<sub>11</sub>N<sub>2</sub>O<sub>3</sub>Cl: C, 51.88; H, 4.35; N, 11.00. Found: C, 51.76; H, 4.28; N, 11.07.

### **General procedure for synthesis of 3,3'-disubstituted-4,4'-disubstituted-[2,2'-bipyrrole]-5,5'-dialdehyde (12):**

Ethyl 3-(3-chloro-4-methoxypyrrol-2-yl)-2-cyanoacrylate (**11a**) (500 mg, 1.96 mmol) and FeCl<sub>3</sub> (954 mg, 5.88 mmol) were taken in trifluoroacetic acid (TFA) (15mL) and stirred at room temperature for 24 h. The reaction mixture was evaporated under reduce pressure, residue was dissolved in acetone and passed through anhydrous K<sub>2</sub>CO<sub>3</sub> following washing with acetone and chloroform until color of solution become colorless. Combined organic layer was evaporated under reduce pressure and subjected to silica gel column chromatography by using CHCl<sub>3</sub> as eluent. Thus orange fluorescent fraction was collected and evaporated leaves oxidative coupled product as purple crystalline solid. Compound was used directly for hydrolysis without further characterizations. Compound obtained in the previous step was subjected to hydrolysis with aqueous 3(M) NaOH (6 mL) under reflux condition for 3 h. The reaction mixture was placed on ice bath, diluted with water (~50 ml) and neutralized with conc. HCl resulted precipitation of compound as bright golden yellow fibrous solid. Precipitated compound was filtered, washed with water and subjected to silica gel column chromatography using EtOAc/hexane (2:8) as eluent gives **12a** (122 mg) as golden yellow fibrous solid.

**4,4'-dichloro-3,3'-dimethoxy-[2,2'-bipyrrole]-5,5'-dialdehyde (12a):**

Yield: 122 mg (39%). m.p: 233.4 °C; IR (neat):  $\nu$  (cm<sup>-1</sup>) 3277, 1655; <sup>1</sup>H NMR (400 MHz, CDCl<sub>3</sub>),  $\delta$  (ppm): 9.64 (s, 2H), 9.51 (br s, 2H), 4.11 (s, 6H); <sup>13</sup>C NMR (100 MHz, CDCl<sub>3</sub>),  $\delta$ (ppm): 176.55, 141.49, 125.11, 117.72, 113.71, 61.68; UV-Vis data in CHCl<sub>3</sub>,  $\lambda_{\max}$  nm (log  $\epsilon$ ): 397 (4.57); Fluorescence in CHCl<sub>3</sub>,  $\lambda_{\max}$  nm : 450; Fluorescence quantum yield in CHCl<sub>3</sub> ( $\phi_f$ ): 0.77; HRMS (ESI+): m/z: calculated for C<sub>12</sub>H<sub>11</sub>N<sub>2</sub>O<sub>4</sub>Cl<sub>2</sub> (M+H<sup>+</sup>): 317.0090; found: 317.0098.

**3,3'-dichloro-4,4'-dimethoxy-[2,2'-bipyrrole]-5,5'-dialdehyde (12b):**

Ethyl 3-(4-chloro-3-methoxypyrrol-2-yl)-2-cyanoacrylate (**11b**) (500 mg, 1.96 mmol) was taken for reaction and 9b was purified by silica gel column chromatography using EtOAc/hexane (3:7) as eluent gives **12b** (48 mg) as light yellow solid. Yield: 15%. m.p: 259.3 °C; IR (neat):  $\nu$  (cm<sup>-1</sup>) 3193, 1655; <sup>1</sup>H NMR (400 MHz, DMSO-d<sub>6</sub>),  $\delta$  (ppm): 12.30 (br s, 2H), 9.68 (s, 2H), 4.04 (s, 6H); <sup>13</sup>C NMR (100 MHz, CDCl<sub>3</sub>),  $\delta$  (ppm): 176.97, 149.94, 123.14, 121.08, 103.75, 62.40; UV-Vis data in CHCl<sub>3</sub>,  $\lambda_{\max}$  nm (log  $\epsilon$ ): 365 (4.56), 384 (4.57); Fluorescence in CHCl<sub>3</sub>,  $\lambda_{\max}$  nm : 402, 422; Fluorescence quantum yield in CHCl<sub>3</sub> ( $\phi_f$ ): 0.08; HRMS (ESI+): m/z: calculated for C<sub>12</sub>H<sub>11</sub>N<sub>2</sub>O<sub>4</sub>Cl<sub>2</sub> (M+H<sup>+</sup>): 317.0090; found: 317.0063; Elemental analysis Calcd for C<sub>12</sub>H<sub>10</sub>N<sub>2</sub>O<sub>4</sub>Cl<sub>2</sub>: C, 45.45; H, 3.18; N, 8.83. Found: C, 45.38; H, 3.26; N, 8.72.

**Synthesis of 4,4'-dichloro-3,3'-dimethoxy-[2,2'-bipyrrole]-5,5'-dialdehyde (12a) by PIFA coupling:**



To a stirred solution of Ethyl 3-(3-chloro-4-methoxypropyl)-2-cyanoacrylate (**11a**) (500 mg, 1.96 mmol) in CH<sub>2</sub>Cl<sub>2</sub> (50 mL), PIFA (843 mg, 1.96 mmol) and BF<sub>3</sub>·OEt<sub>2</sub> (484 μL, 3.92 mmol) were quickly added at -78 °C under nitrogen. The reaction mixture was then stirred for 4 h, while the reaction temperature was maintained below -40 °C. After the reaction completion, saturated aqueous NaHCO<sub>3</sub> (ca. 50 mL) was added to the mixture, and then stirred for an additional 10 minutes at ambient temperature. The organic layer was separated and the aqueous phase was extracted with CH<sub>2</sub>Cl<sub>2</sub>. The combined extract was dried with Na<sub>2</sub>SO<sub>4</sub> and evaporated to dryness and the crude reaction mixture was purified by silica gel column using CHCl<sub>3</sub> as eluent. Thus orange fluorescent fraction was collected and evaporated leaves oxidative coupled product as purple crystalline solid. Deprotection of cyanoacrylate groups and purification were carried out as discussed above for **12a**. Yield: 105 mg (34%).

#### **General procedure for synthesis of β-tetrachlorotetramethoxyphycenes:**

To a slurry of low-valent titanium reagent, generated by reduction of titanium tetrachloride (1.73 mL, 15.75 mmol) in dry THF (100 mL) with activated zinc (2.06 g) and CuCl (481mg, 4.86 mmol) by refluxing 3 h, a solution of **12a** (200 mg, 0.63 mmol) in dry THF (100 mL) was added dropwise slowly over 3 h under reflux condition with vigorous stirring. The reaction mixture was heated under reflux for an additional 1 h and then hydrolyzed by slow addition of 10% aqueous sodium carbonate (ca. 100 mL) to the ice cooled reaction mixture. The reaction mixture was filtered through celite to remove the excess metal, washed with CHCl<sub>3</sub> until color of the filtrate become colorless and organic layer was separated. Organic layer was passed through anhydrous sodium sulphate and evaporated to dryness under reduce pressure. The crude reaction mixture was purified by silica gel column chromatography using CHCl<sub>3</sub> as eluent yields 51 mg compound **1a** as blue purple crystalline solid.

#### **2,7,12,17-Tetrachloro-3,6,13,16-tetramethoxyphycene (1a):**

Yield: 28%. m.p: >300 °C; <sup>1</sup>H NMR (500 MHz, CDCl<sub>3</sub>), δ (ppm): 9.80 (s, 4H), 4.78 (s, 12H), 0.98 (br s, 2H); UV-Vis data in CHCl<sub>3</sub>, λ<sub>max</sub> nm (log ε): 376 (5.16), 384 (5.14), 565 (4.58), 608 (4.35), 647 (4.52); Fluorescence in CHCl<sub>3</sub>, (λ<sub>exc</sub> 382 nm) nm: 655, 717; Fluorescence quantum yield in CHCl<sub>3</sub> (φ<sub>f</sub>): 0.00071; HRMS (ESI+): m/z: calculated for C<sub>24</sub>H<sub>19</sub>N<sub>4</sub>O<sub>4</sub>Cl<sub>4</sub> (M+H<sup>+</sup>): 567.0155; found: 567.0165.

#### **3,6,13,16-Tetrachloro-2,7,12,17-tetramethoxyphycene (1b):**

3,3'-dichloro-4,4'-dimethoxy-[2,2'-bipyrrole]-5,5'-dialdehyde (**12b**) (60 mg, 0.19 mmol) and THF (50 mL + 50 mL) were taken and **12b** in 50 mL THF was added drop wise over 3 h. Yield: 12 mg (22%). m.p: >300 °C; <sup>1</sup>H NMR (400 MHz, CDCl<sub>3</sub>), δ (ppm): 9.65 (s, 4H), 4.82 (s, 12H), 0.16 (br s, 2H); UV-Vis data in CHCl<sub>3</sub>, λ<sub>max</sub> nm (log ε): 385 (5.13), 572 (4.52), 625 (4.31), 664 (4.46); Fluorescence, (λ<sub>exc</sub> 572 nm) nm: 676; Fluorescence quantum yield in CHCl<sub>3</sub> (Φ<sub>f</sub>): 0.00075; HRMS (ESI+): m/z: calculated for C<sub>24</sub>H<sub>19</sub>N<sub>4</sub>O<sub>4</sub>Cl<sub>4</sub> (M+H<sup>+</sup>): 567.0155; found: 567.0160; Elemental analysis Calcd for C<sub>24</sub>H<sub>18</sub>N<sub>4</sub>O<sub>4</sub>Cl<sub>4</sub>: C, 50.73; H, 3.19; N, 9.86. Found: C, 50.65; H, 3.26; N, 9.78.

#### **General procedure for synthesis of Zn(II)-β-tetrachlorotetramethoxyporphycenes (Zn1):**

2,7,12,17-Tetrachloro-3,6,13,16-tetramethoxyporphycene (**1a**) (10 mg, 0.018 mmol) and Zn(OAc)<sub>2</sub>·2H<sub>2</sub>O (77 mg, 0.35 mmol) were taken in 40 mL of CHCl<sub>3</sub>/MeOH (1:1) under nitrogen. The reaction mixture was refluxed for 4 h and solvent was evaporated under reduce pressure. Residue was purified by activated neutral alumina column chromatography using CHCl<sub>3</sub>/MeOH (49:1) as eluent gives **Zn1a** (4 mg) as blue purple solid.

#### **Zn(II)-2,7,12,17-tetrachloro-3,6,13,16-tetramethoxyporphycene (Zn1a):**

Yield: 35%. m.p: >300 °C; <sup>1</sup>H NMR (400 MHz, CDCl<sub>3</sub> in presence of small amount of CD<sub>3</sub>OD), δ (ppm): 9.84 (s, 4H), 4.79 (s, 12H); UV-Vis data, λ<sub>max</sub> nm (log ε): 391 (5.24), 588 (4.33), 638 (4.90); Fluorescence, (λ<sub>exc</sub> 390 nm) nm: 645, 706; Fluorescence quantum yield in CHCl<sub>3</sub> (Φ<sub>f</sub>): 0.17; HRMS (ESI+): m/z: calculated for C<sub>24</sub>H<sub>17</sub>N<sub>4</sub>O<sub>4</sub>Cl<sub>4</sub>Zn (M+H<sup>+</sup>): 628.9290; found: 628.9299.

#### **Zn(II)-3,6,13,16-tetrachloro-2,7,12,17-tetramethoxyporphycene (Zn1b):**

5 mg of **1b** was taken for reaction. After reaction was over, solvent was evaporated under reduce pressure. Residue was dissolved in CHCl<sub>3</sub>, washed with water and chloroform layer was passed through anhydrous Na<sub>2</sub>SO<sub>4</sub>. Solvent was evaporated under reduce pressure gives entitled **Zn1b** (5.2 mg) as purple solid. Yield: 93%. m.p: >300 °C; <sup>1</sup>H NMR (400 MHz, CDCl<sub>3</sub> in presence of small amount of CD<sub>3</sub>OD), δ (ppm): 9.73 (s, 4H), 4.77 (s, 12H); UV-Vis data in CHCl<sub>3</sub>, λ<sub>max</sub> nm (log ε): 391(4.90), 604 (4.14), 638 (4.61); Fluorescence, (λ<sub>exc</sub> 390 nm) nm: 654, 711; Fluorescence quantum yield in CHCl<sub>3</sub> (Φ<sub>f</sub>): 0.16; HRMS (ESI+): m/z: calculated for C<sub>24</sub>H<sub>16</sub>N<sub>4</sub>O<sub>4</sub>Cl<sub>4</sub>ZnNa (M+Na<sup>+</sup>): 650.9109; found: 650.9115; Elemental analysis Calcd for C<sub>24</sub>H<sub>16</sub>N<sub>4</sub>O<sub>4</sub>Cl<sub>4</sub>Zn: C, 45.64; H, 2.55; N, 8.87. Found: C, 45.58; H, 2.61; N, 8.76.

#### **General procedure for synthesis of Pd(II)-β-tetrachloro-β-tetramethoxyporphycenes (Pd1):**

2,7,12,17-Tetrachloro-3,6,13,16-tetramethoxyphycene (**1a**) (10 mg, 0.018 mmol) and Pd(OAc)<sub>2</sub> (40 mg, 0.18 mmol) were taken in 40 mL AcOH/DCE (1:1) and stirred under reflux condition for 4 h. The solvent was evaporated under reduce pressure and residue was washed with diethylether to remove unreacted Pd(OAc)<sub>2</sub>. Then, residue was dissolved in CHCl<sub>3</sub> under reflux condition, filtered and washed repeatedly with hot CHCl<sub>3</sub> until color of the filtrate became colorless. Combined solvent was evaporated under reduce pressure resulted the entitled compound **Pd1a** (10.1 mg) as purple solid.

**Pd(II)-2,7,12,17-tetrachloro-3,6,13,16-tetramethoxyphycene (Pd1a):**

Yield: 83%. m.p: >300 °C; UV-Vis data in CHCl<sub>3</sub>, λ<sub>max</sub> nm (log ε): 389(4.94), 561 (4.14), 606 (4.70); HRMS (ESI+): m/z: calculated for C<sub>24</sub>H<sub>16</sub>N<sub>4</sub>O<sub>4</sub>Cl<sub>4</sub>PdNa (M+Na<sup>+</sup>): 692.8853; found: 692.8853.

**Pd(II)-3,6,13,16-tetrachloro-2,7,12,17-tetramethoxyphycene (Pd1b):**

4 mg of **1b** was used for reaction. Yield: 4.4 mg (93%). m.p: >300 °C; UV-Vis data in CHCl<sub>3</sub>, λ<sub>max</sub> nm (log ε): 391(4.93), 603 (4.64), 624 (4.55); HRMS (ESI+): m/z: calculated for C<sub>24</sub>H<sub>16</sub>N<sub>4</sub>O<sub>4</sub>Cl<sub>4</sub>PdNa (M+Na<sup>+</sup>): 692.8853; found: 692.8787; Elemental analysis Calcd for C<sub>24</sub>H<sub>16</sub>N<sub>4</sub>O<sub>4</sub>Cl<sub>4</sub>Pd: C, 42.85; H, 2.40; N, 8.33. Found: C, 42.68; H, 2.32; N, 8.41.

**$^1\text{H}$  and  $^{13}\text{C}$  NMR spectra:**

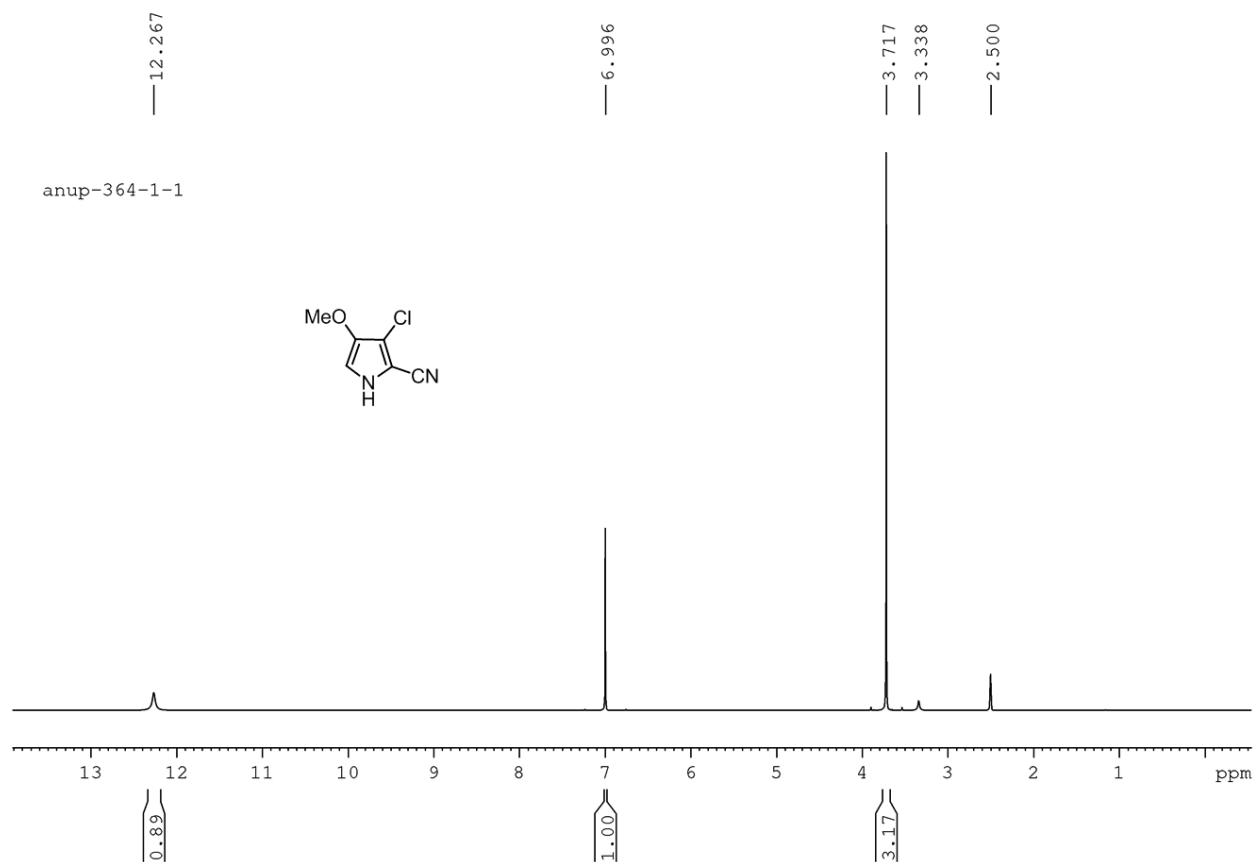

**Figure S1:**  $^1\text{H}$  NMR spectrum of **7** in  $\text{DMSO-d}_6$ .

anup-364-1-1 13C

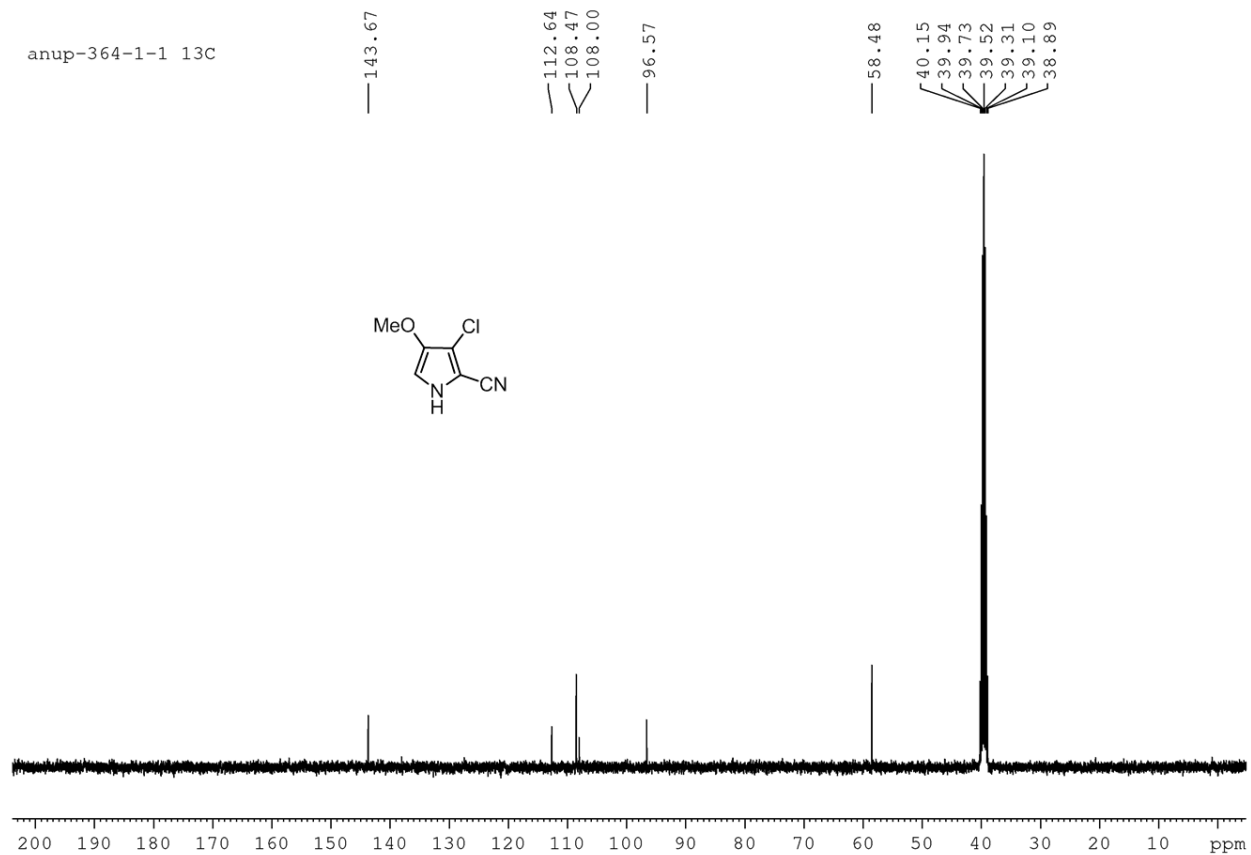

**Figure S2:** <sup>13</sup>C NMR spectrum of 7 in DMSO-d<sub>6</sub>.

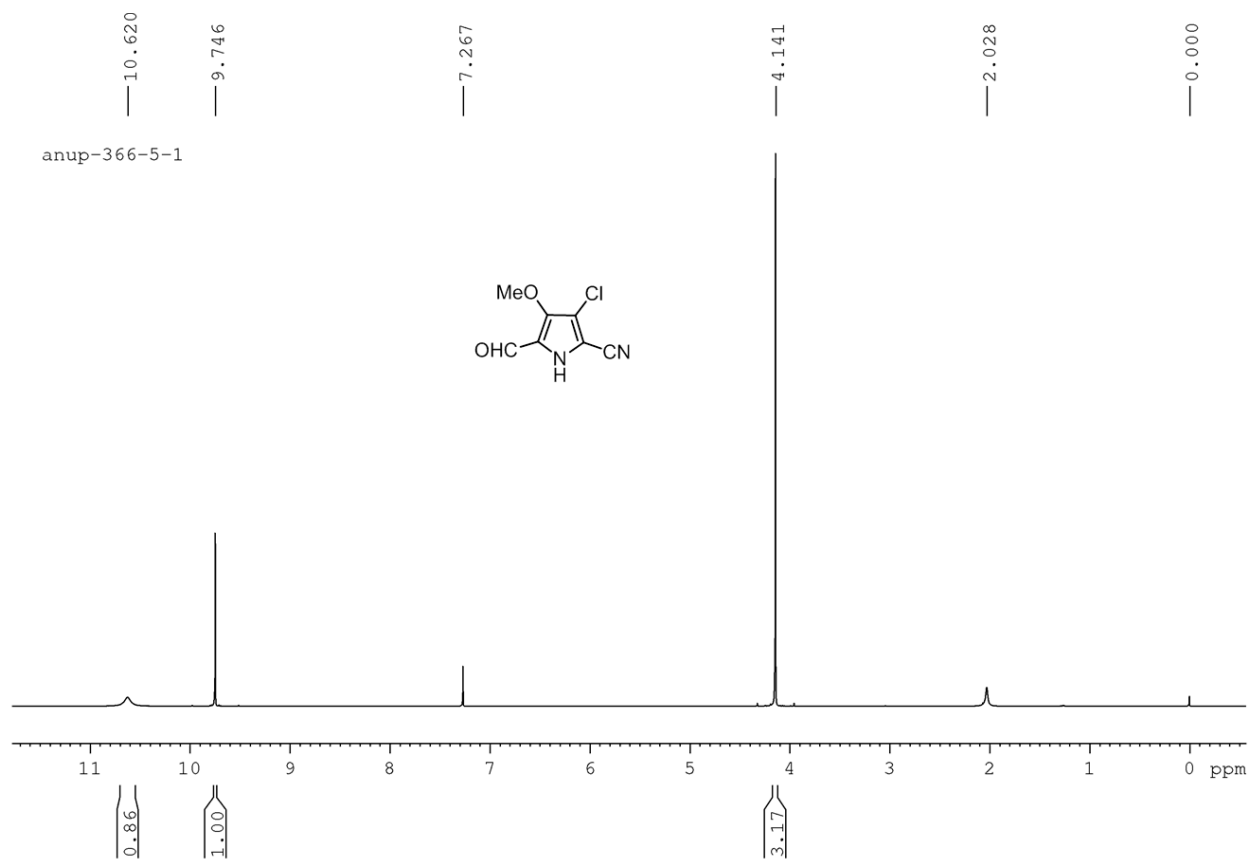

**Figure S3:**  $^1\text{H}$  NMR spectrum of **8** in  $\text{CDCl}_3$ .

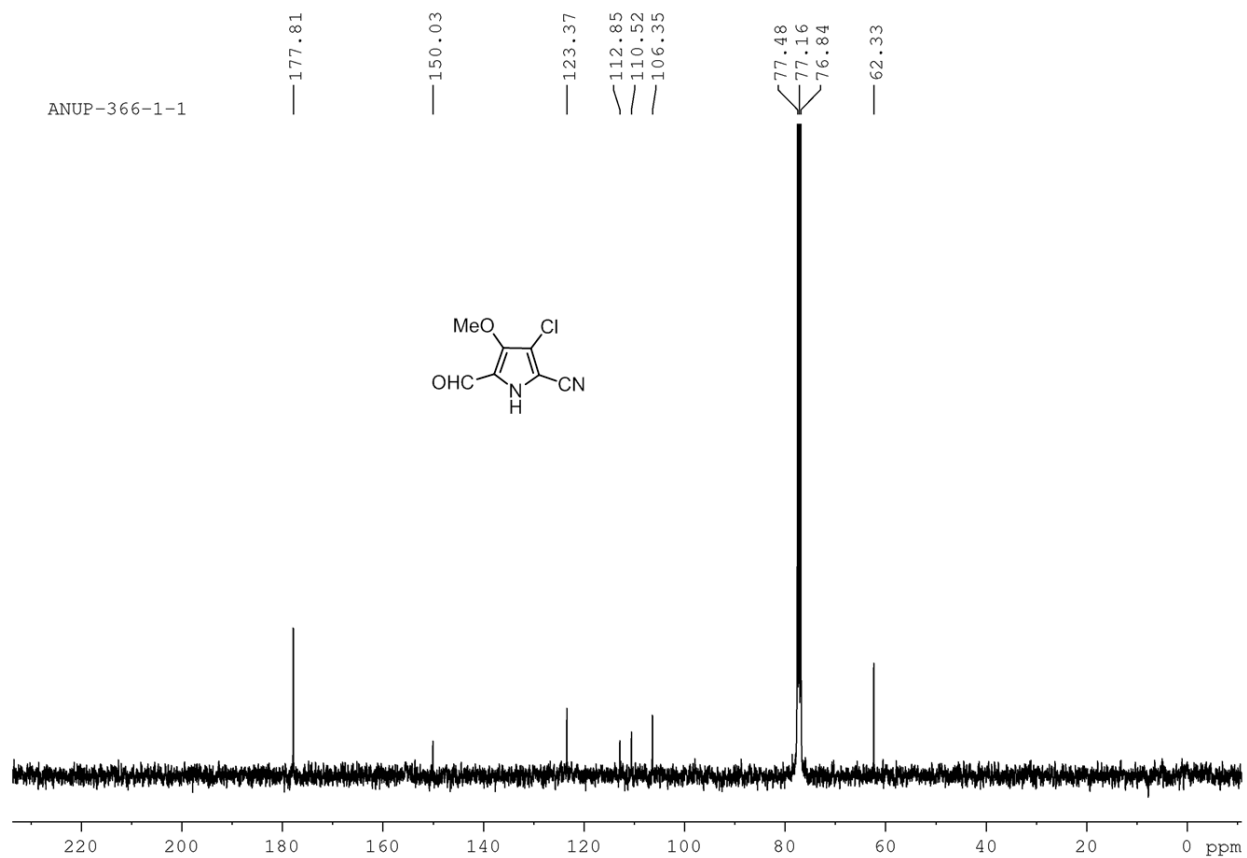

**Figure S4:**  $^{13}\text{C}$  NMR spectrum of **8** in  $\text{CDCl}_3$ .

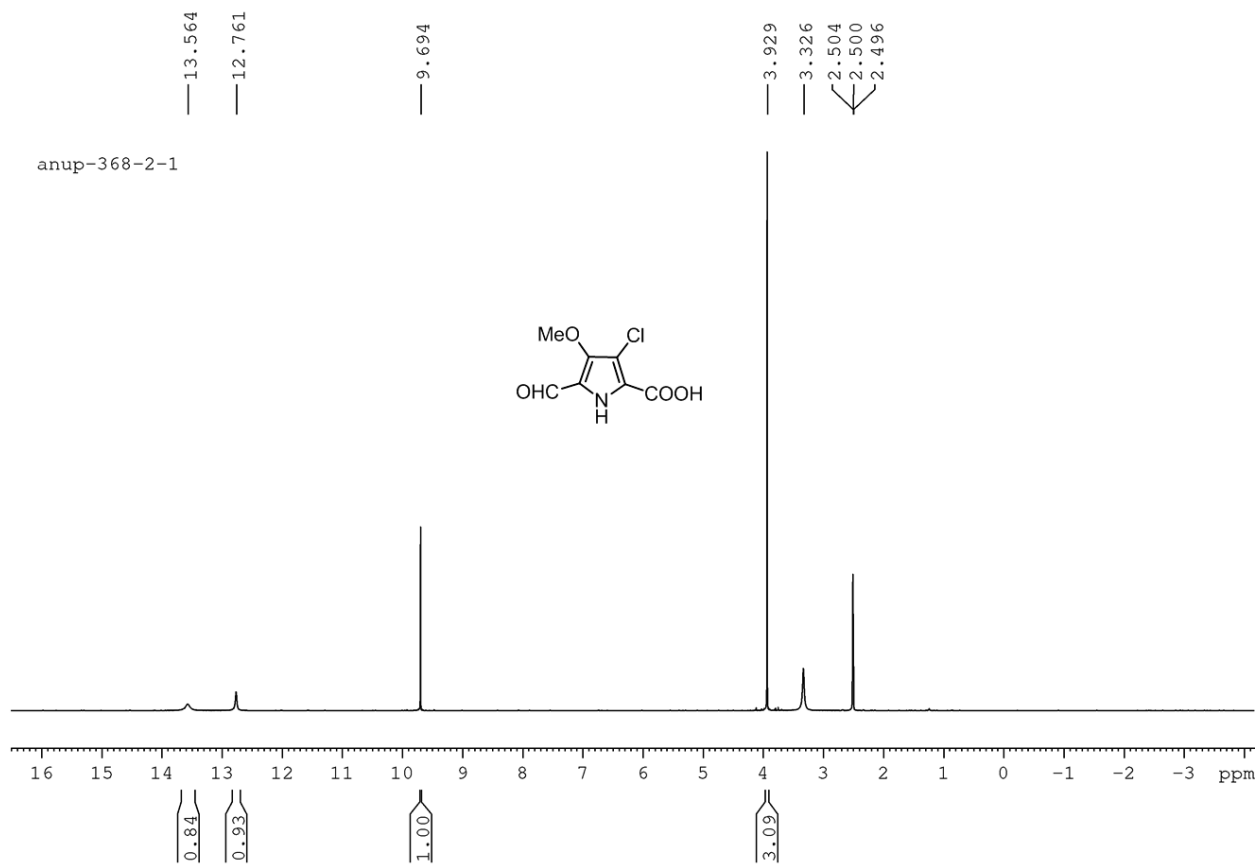

**Figure S5:**  $^1\text{H}$  NMR spectrum of **9** in  $\text{DMSO-d}_6$ .



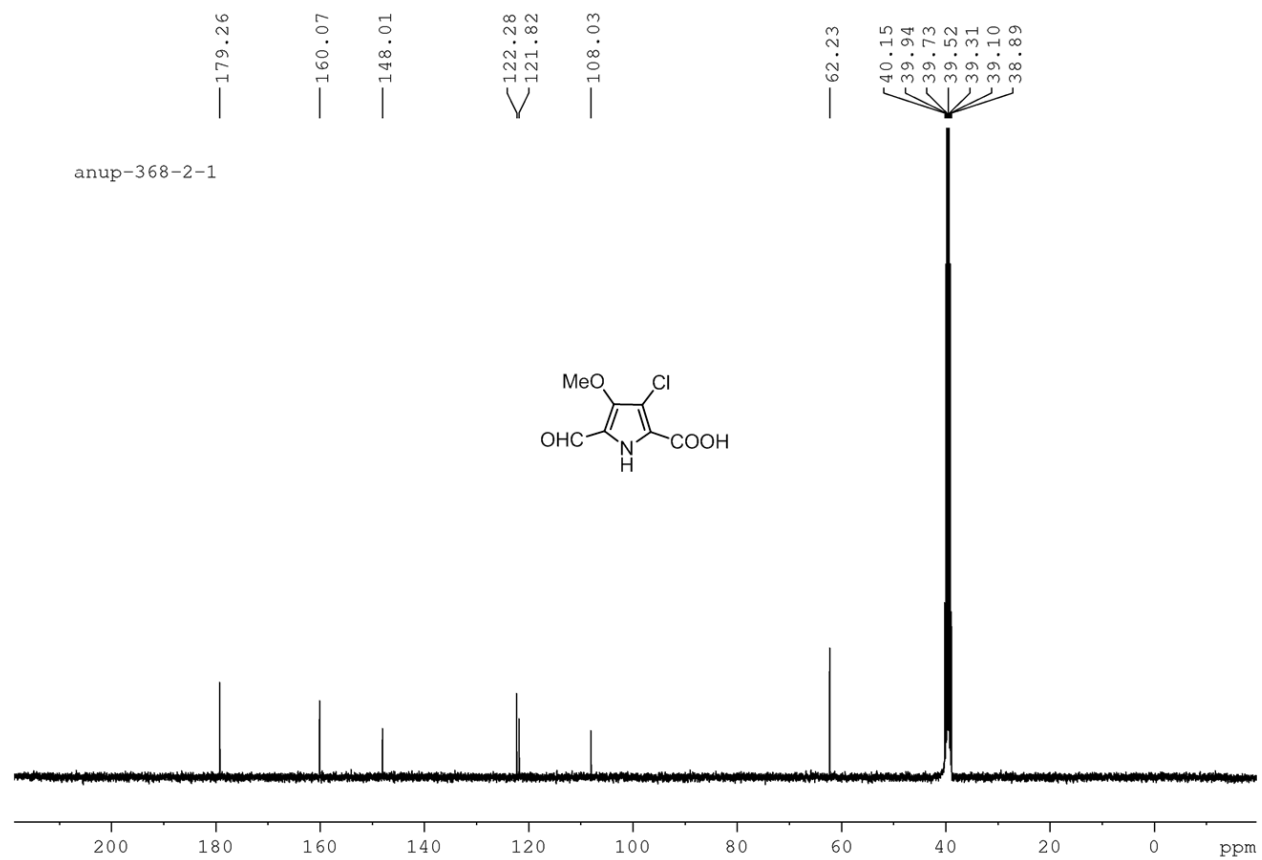

**Figure S6:**  $^{13}\text{C}$  NMR spectrum of **9** in  $\text{DMSO-d}_6$ .

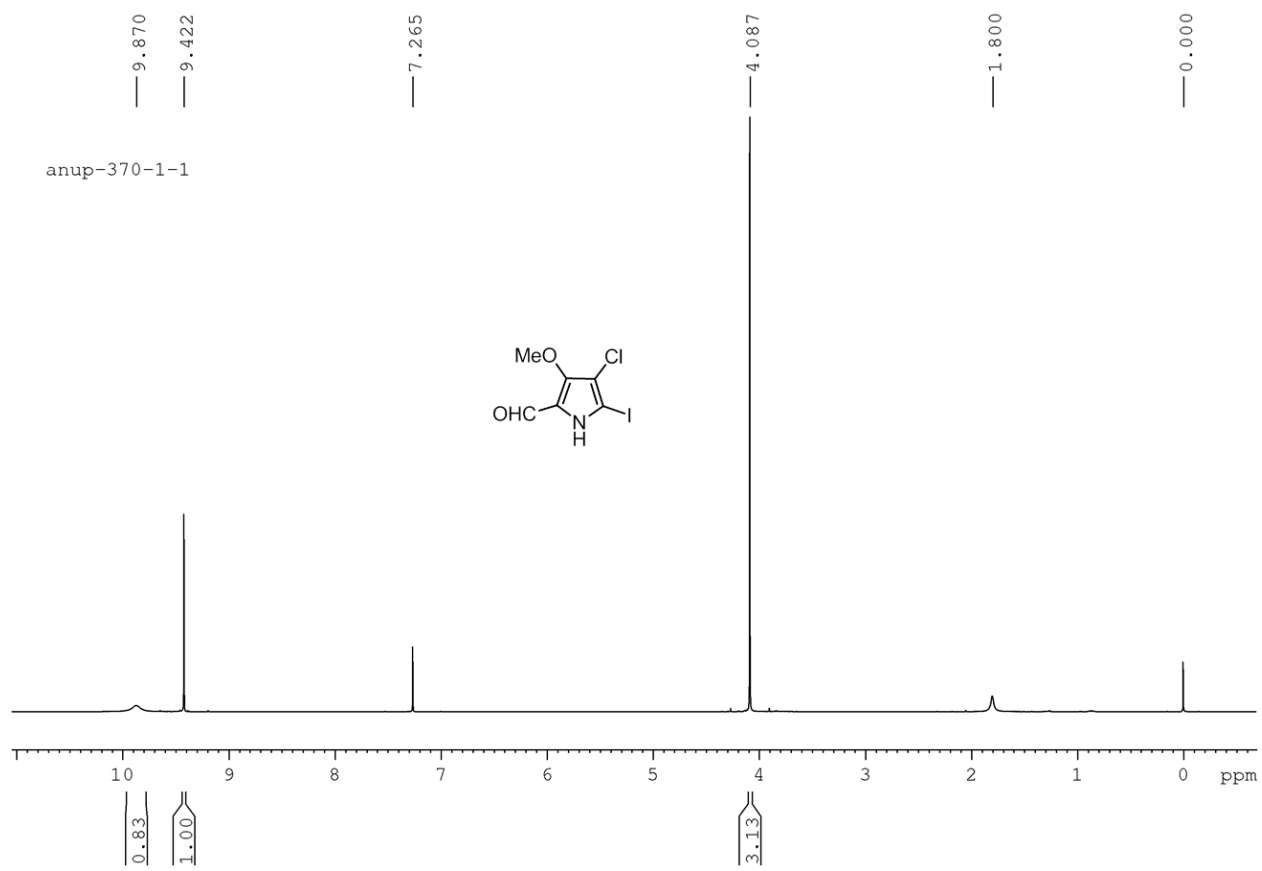

**Figure S7:**  $^1\text{H}$  NMR spectrum of **10** in  $\text{CDCl}_3$ .

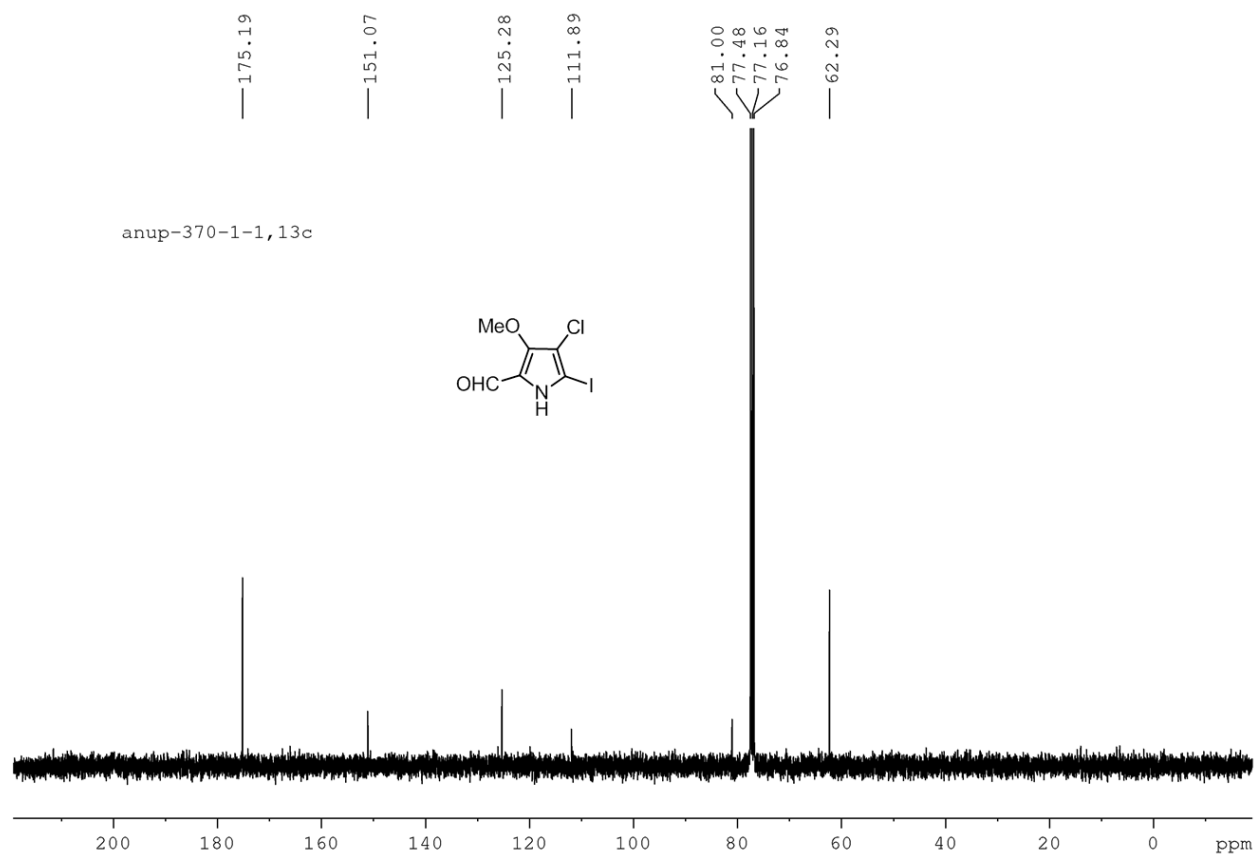

**Figure S8:**  $^{13}\text{C}$  NMR spectrum of **10** in  $\text{CDCl}_3$ .

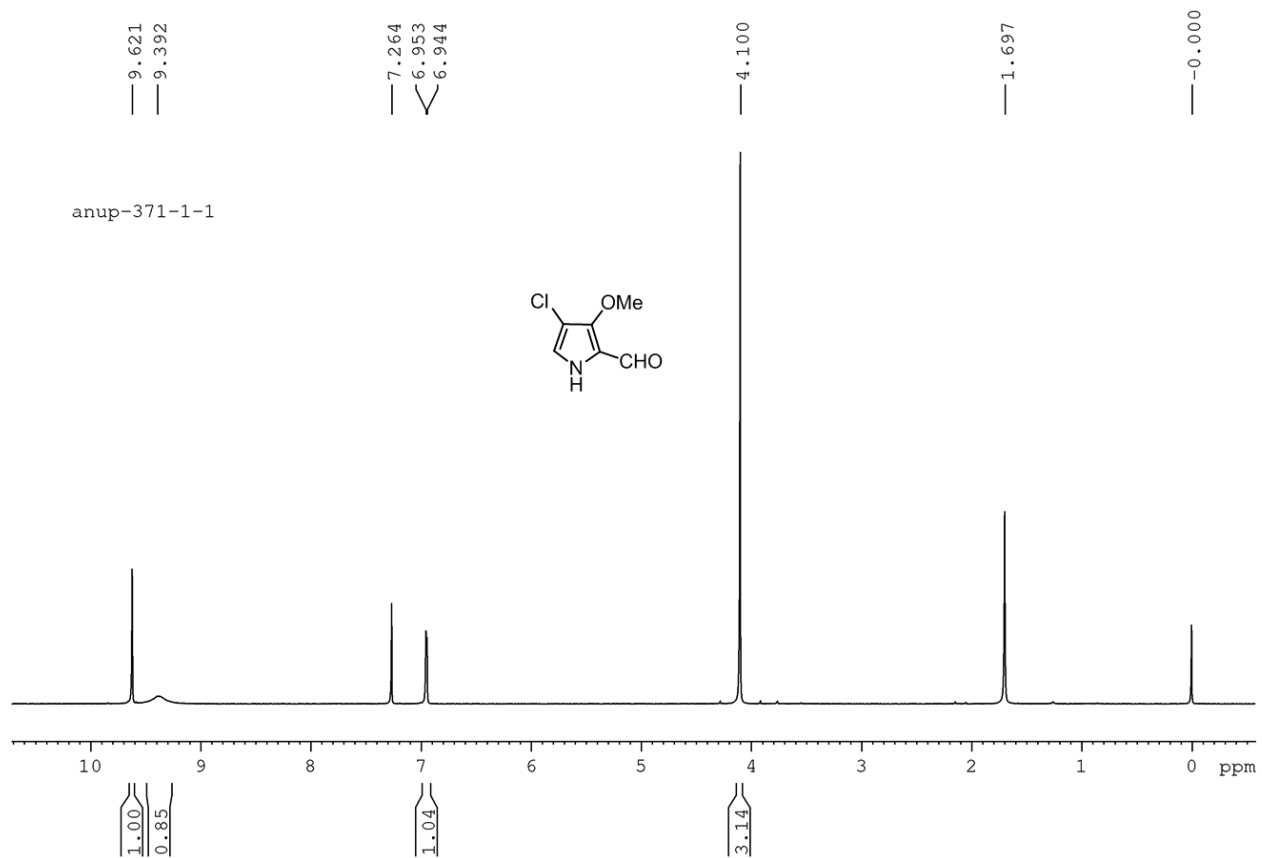

**Figure S9:**  $^1\text{H}$  NMR spectrum of **6** in  $\text{CDCl}_3$ .

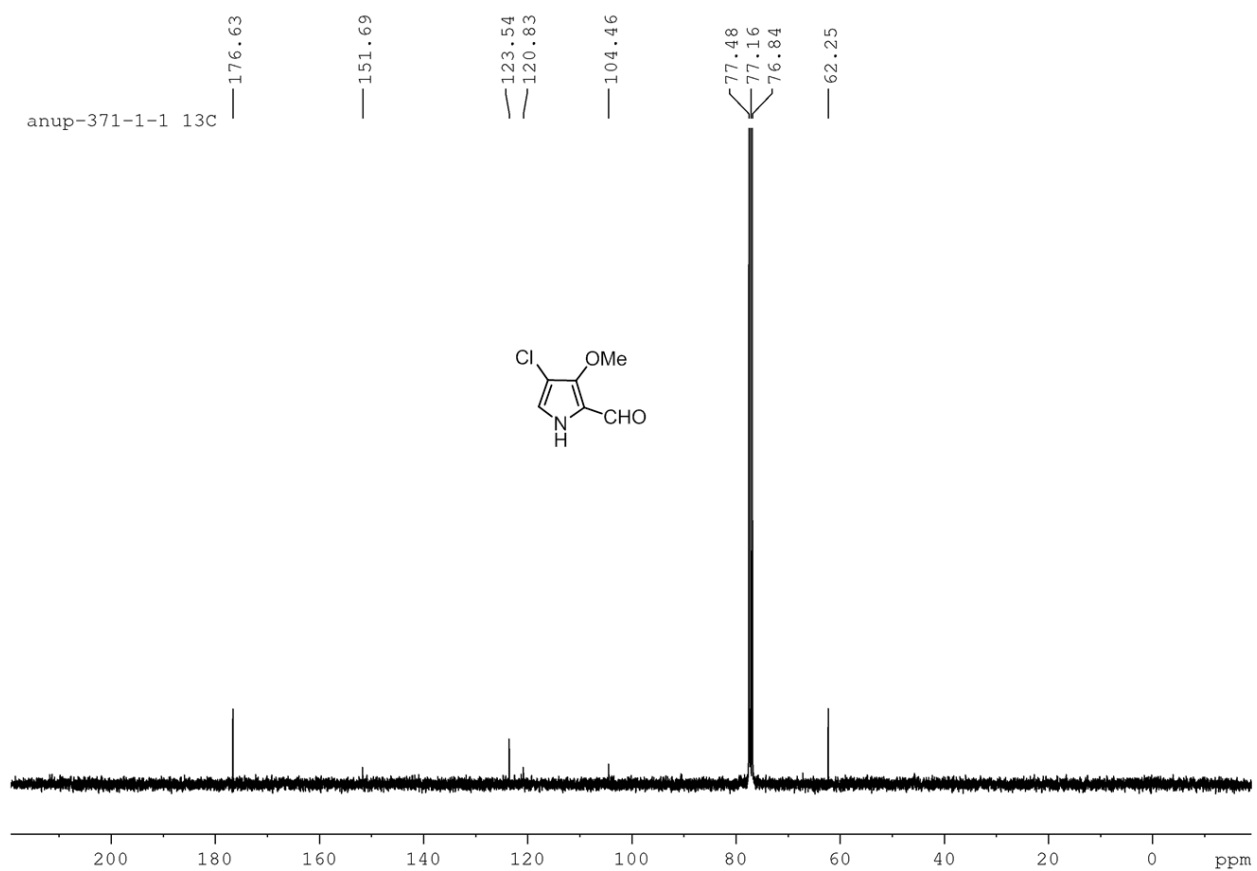

**Figure S10:** <sup>13</sup>C NMR spectrum of **6** in CDCl<sub>3</sub>.

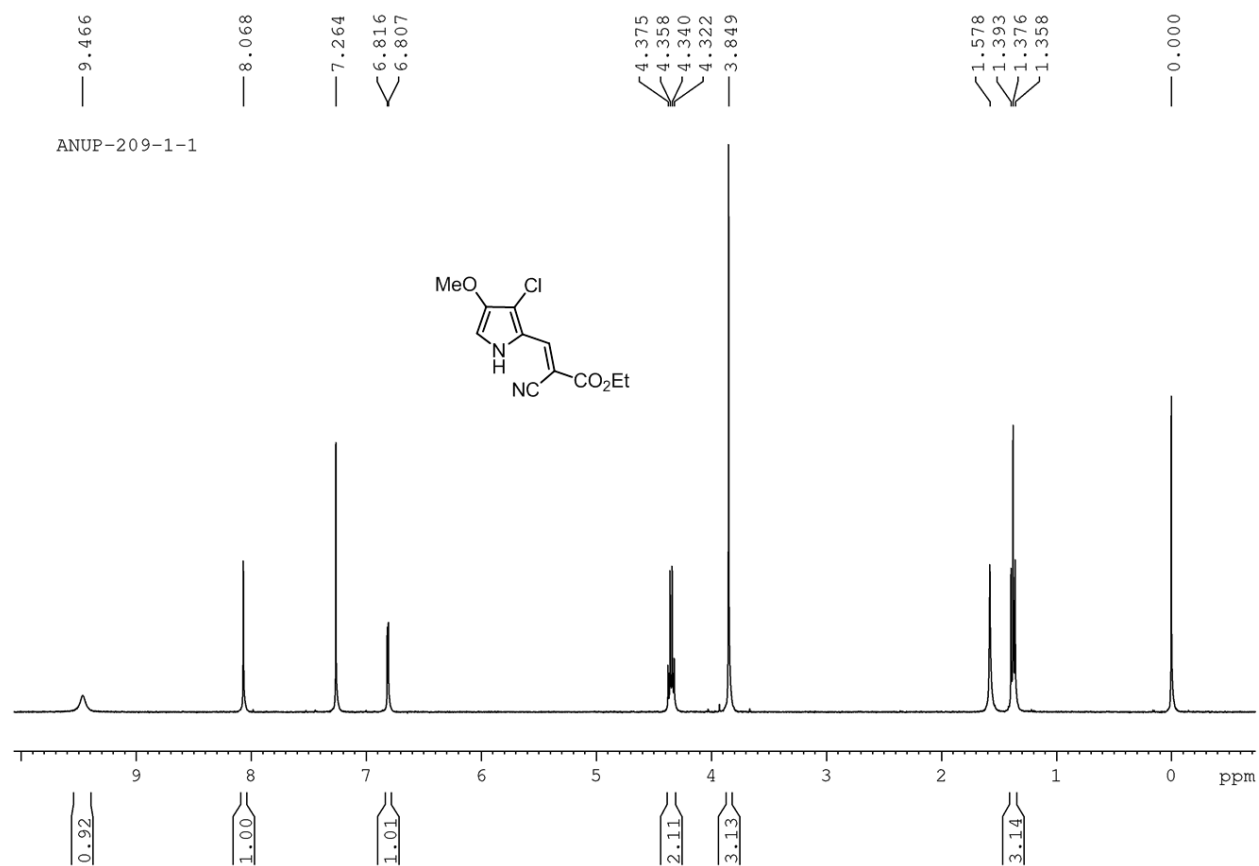

**Figure S11:**  $^1\text{H}$  NMR spectrum of **11a** in  $\text{CDCl}_3$ .

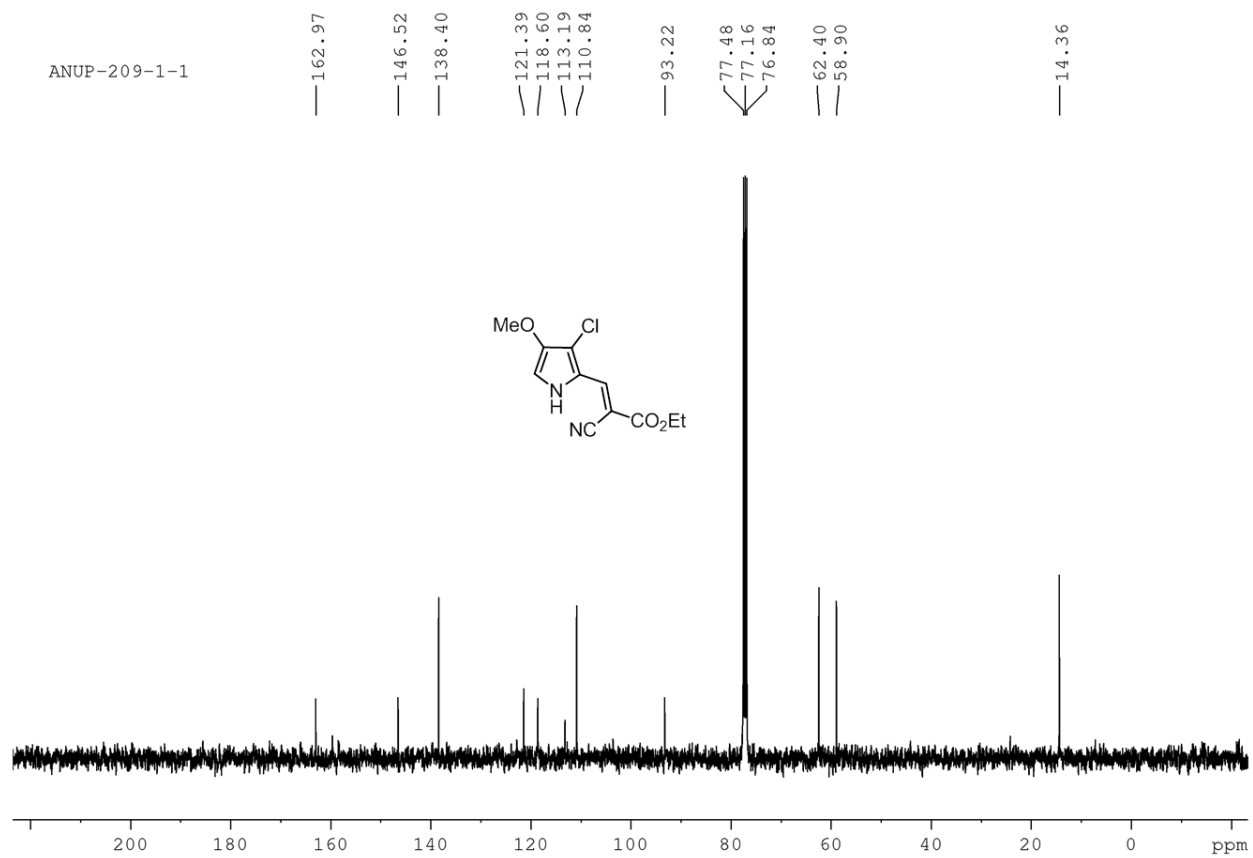

**Figure S12:**  $^{13}\text{C}$  NMR spectrum of **11a** in  $\text{CDCl}_3$ .

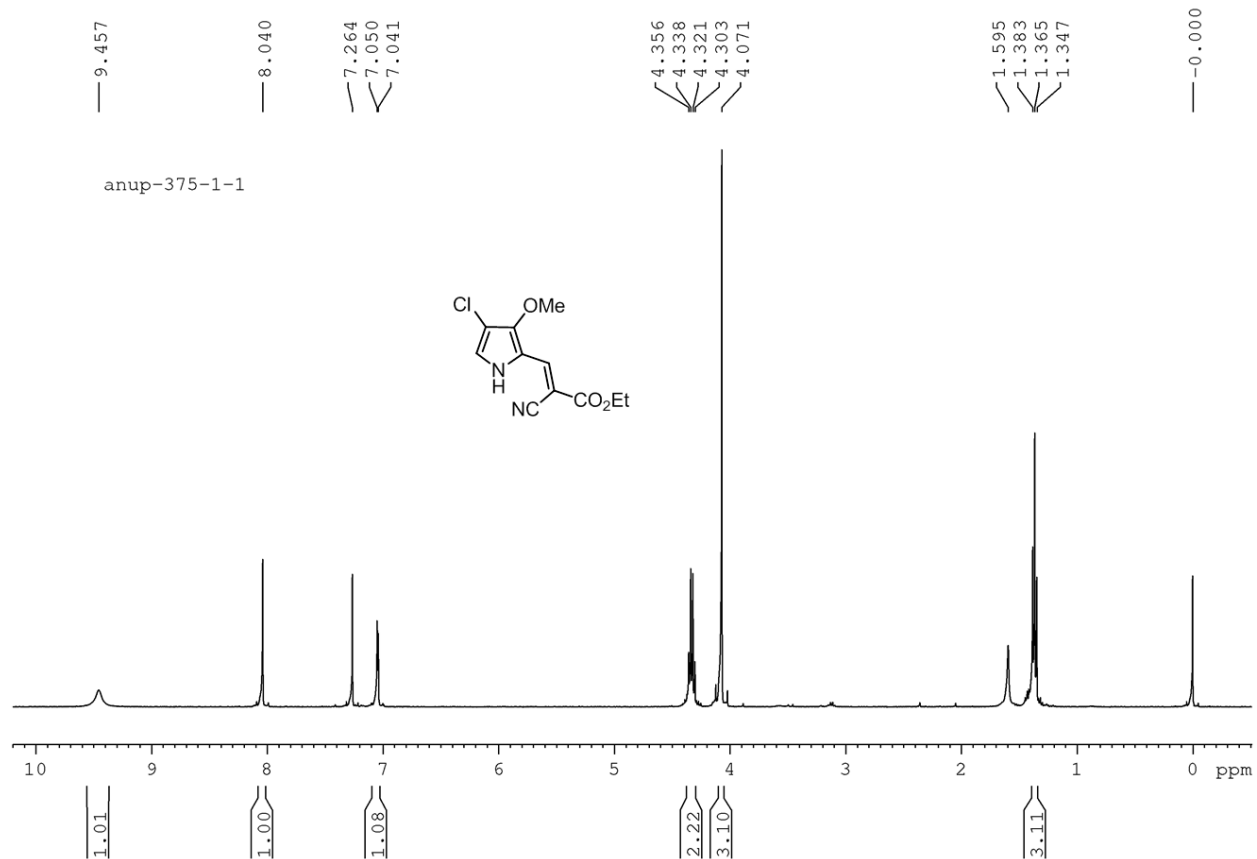

**Figure S13:**  $^1\text{H}$  NMR spectrum of **11b** in  $\text{CDCl}_3$ .



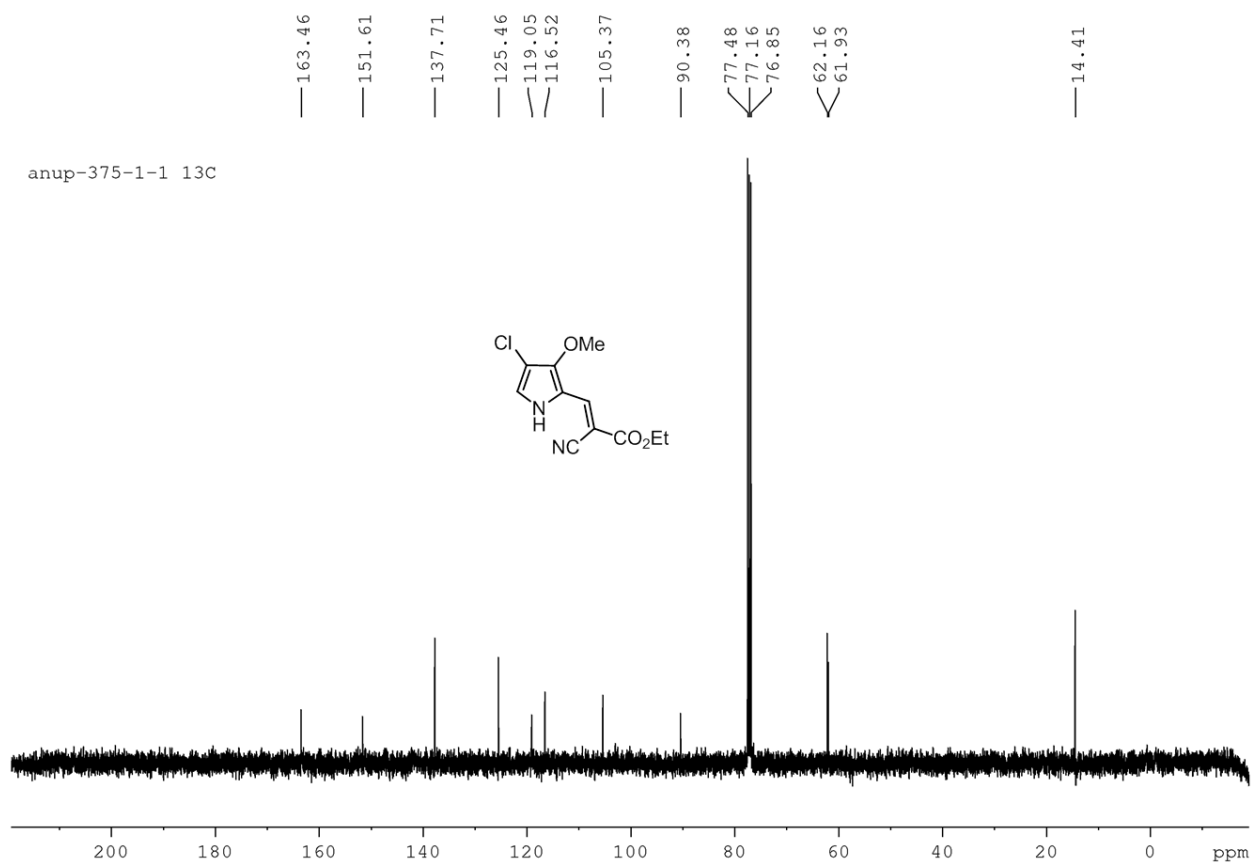

**Figure S14:**  $^{13}\text{C}$  NMR spectrum of **11b** in  $\text{CDCl}_3$ .

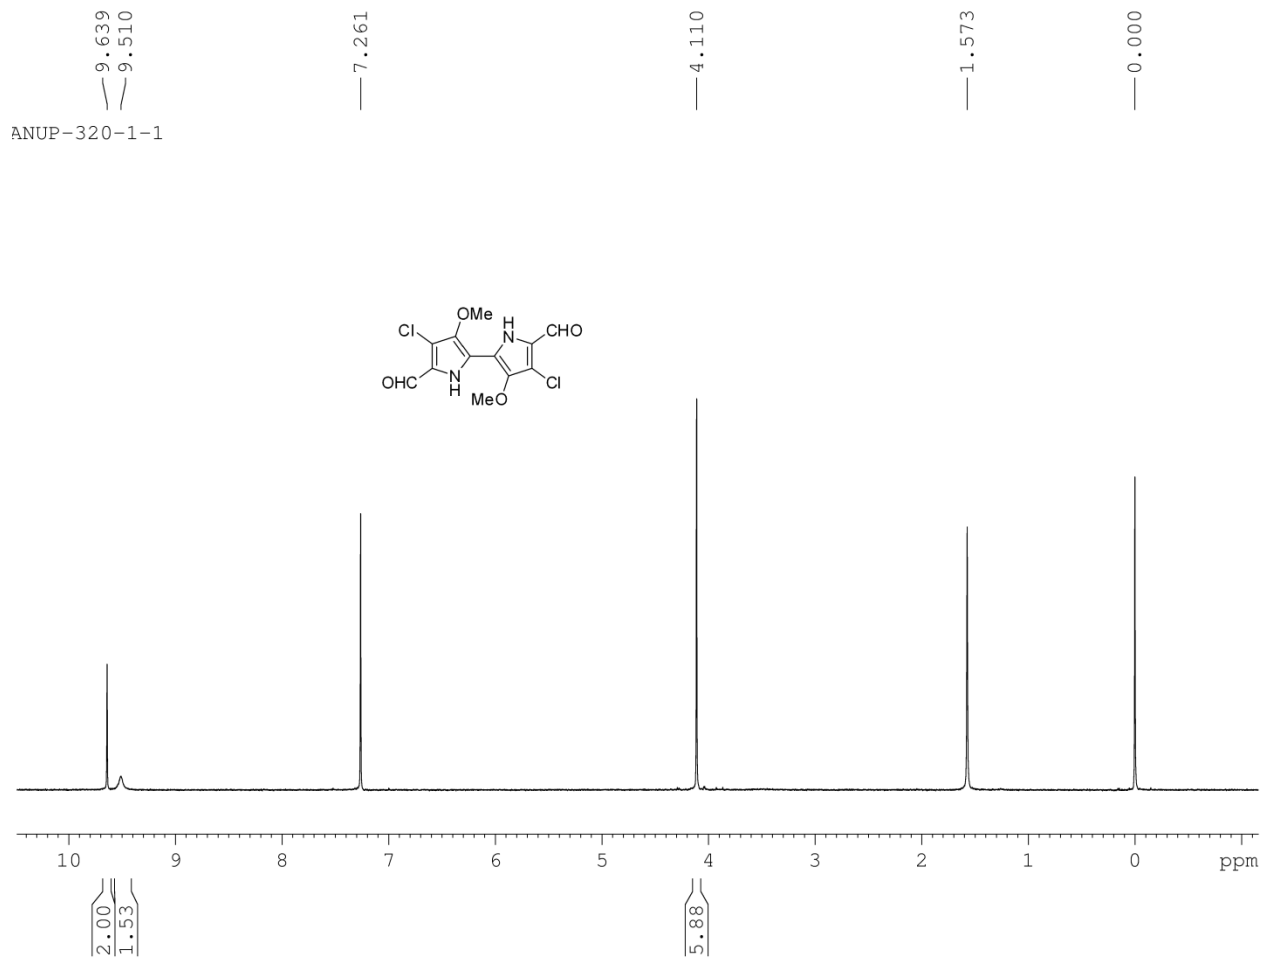

**Figure S15:**  $^1\text{H}$  NMR spectrum of **12a** in  $\text{CDCl}_3$ .

ANUP-320-1-1 (13C)

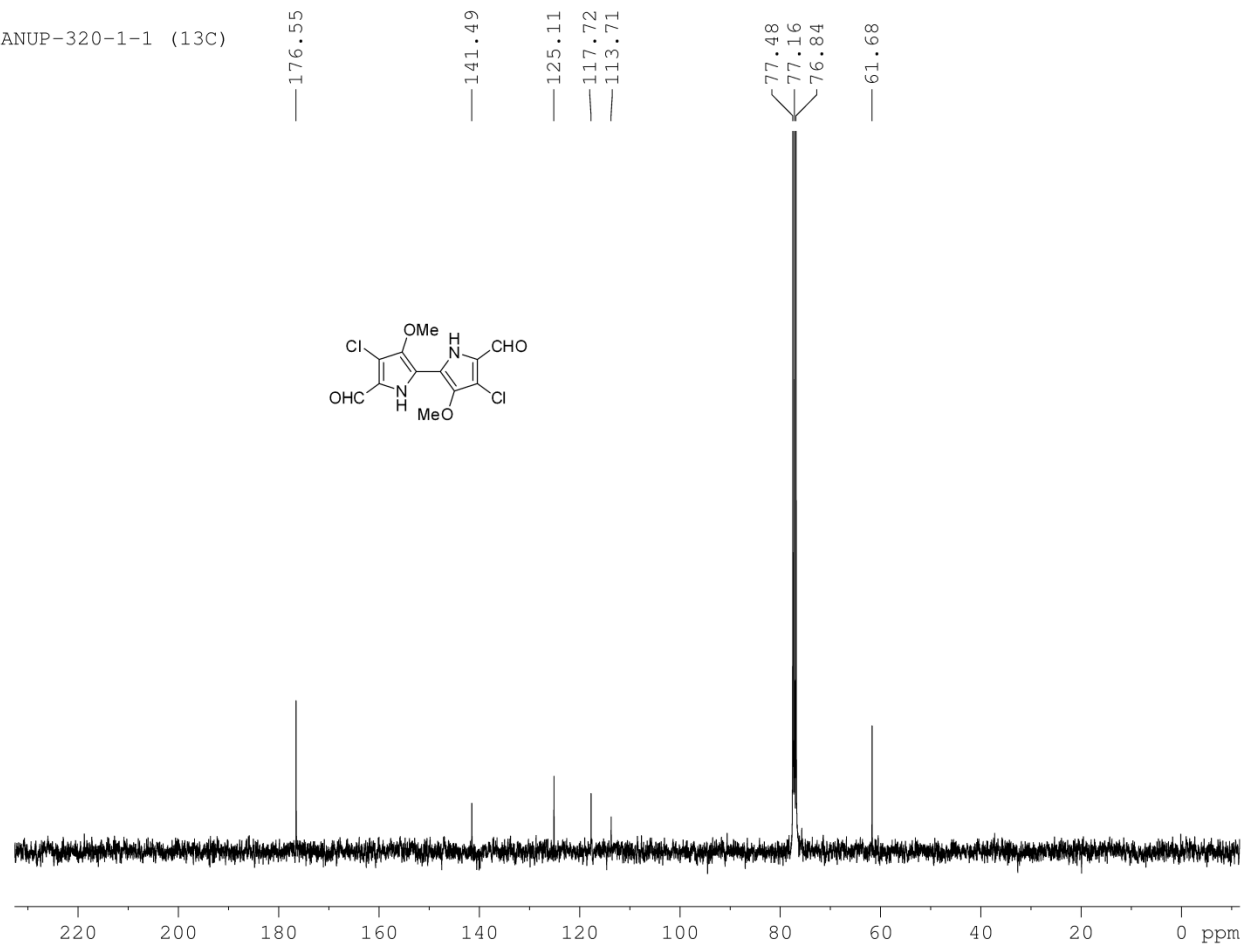

**Figure S16:**  $^{13}\text{C}$  NMR spectrum of **12a** in  $\text{CDCl}_3$ .

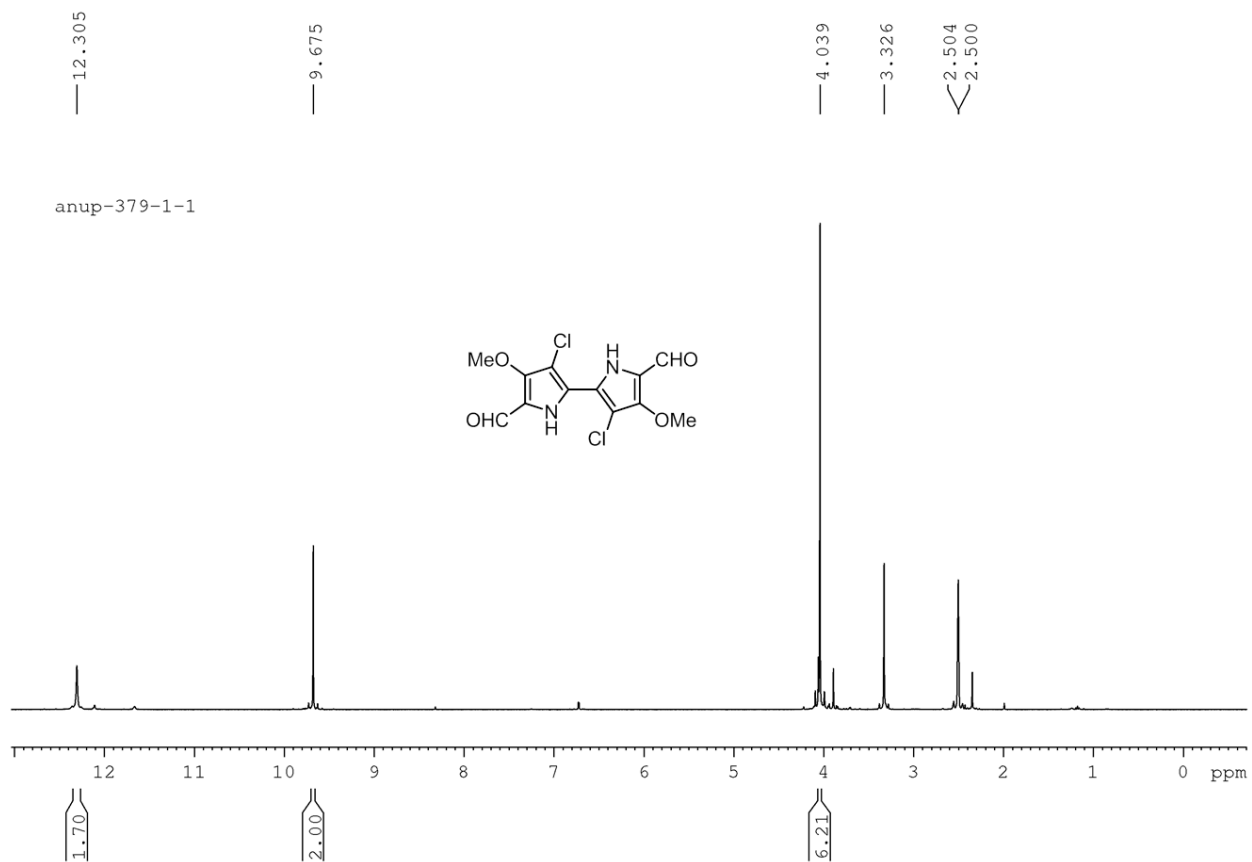

**Figure S17:**  $^1\text{H}$  NMR spectrum of **12b** in  $\text{DMSO-d}_6$ .

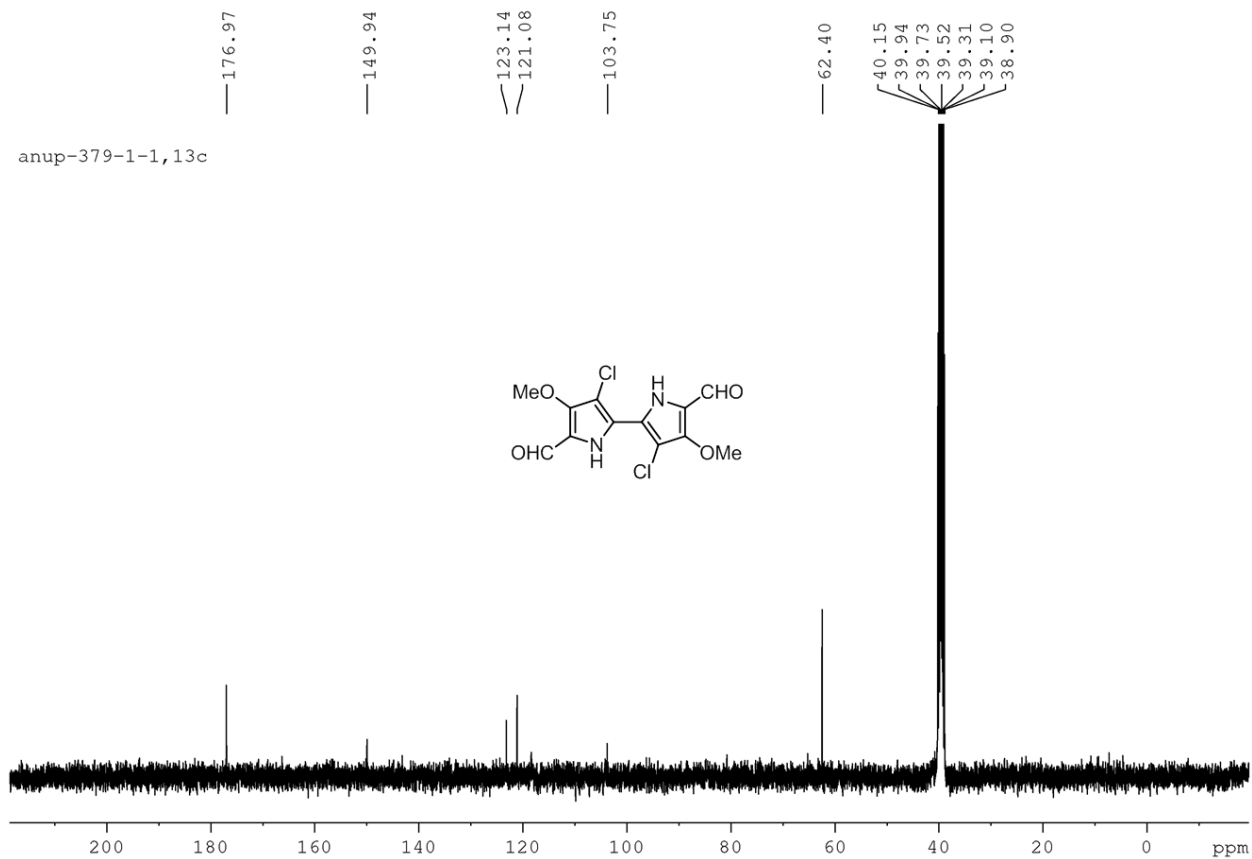

**Figure S18:**  $^{13}\text{C}$  NMR spectrum of **12b** in  $\text{DMSO-d}_6$ .

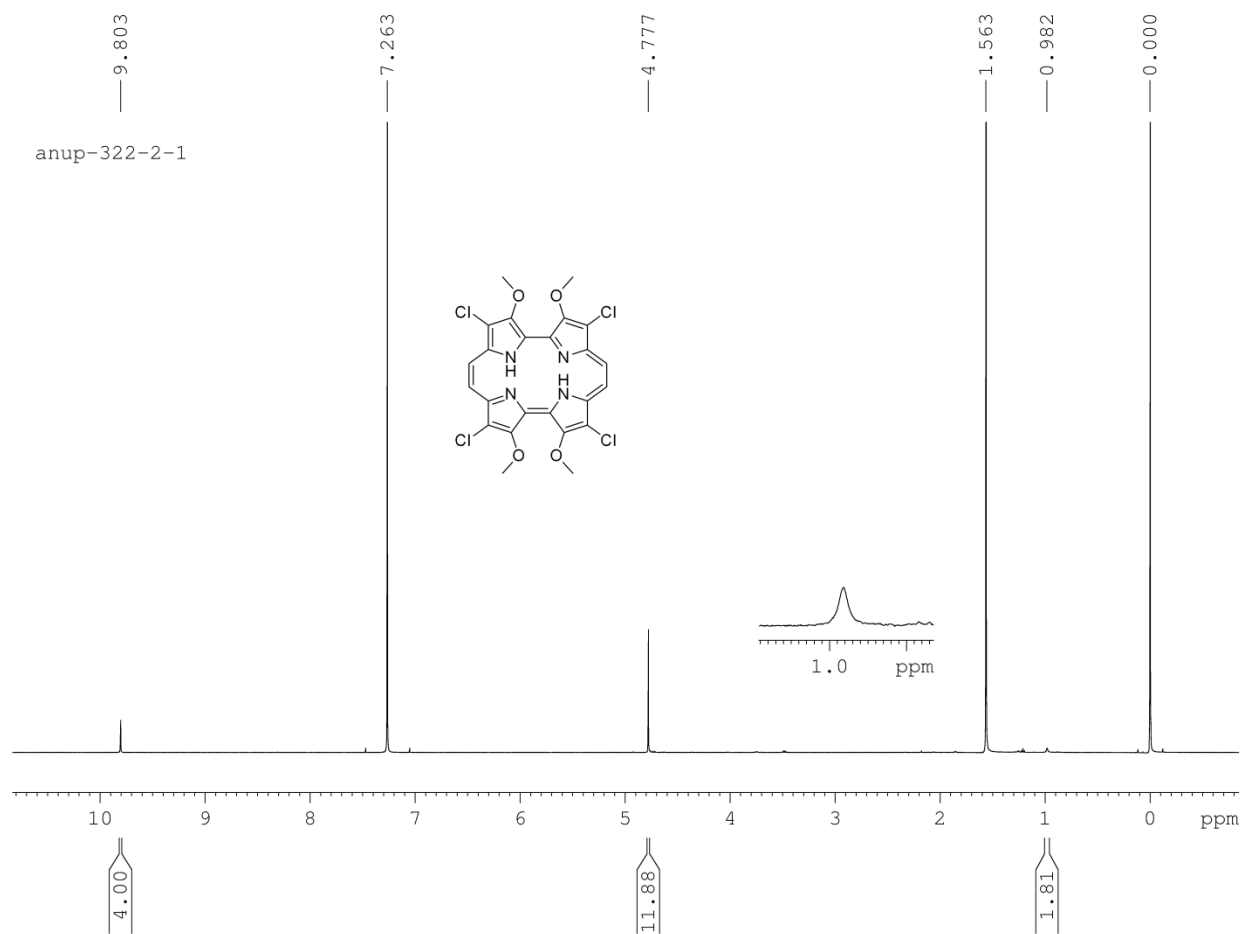

**Figure S19:**  $^1\text{H}$  NMR spectrum of **1a** in  $\text{CDCl}_3$ .

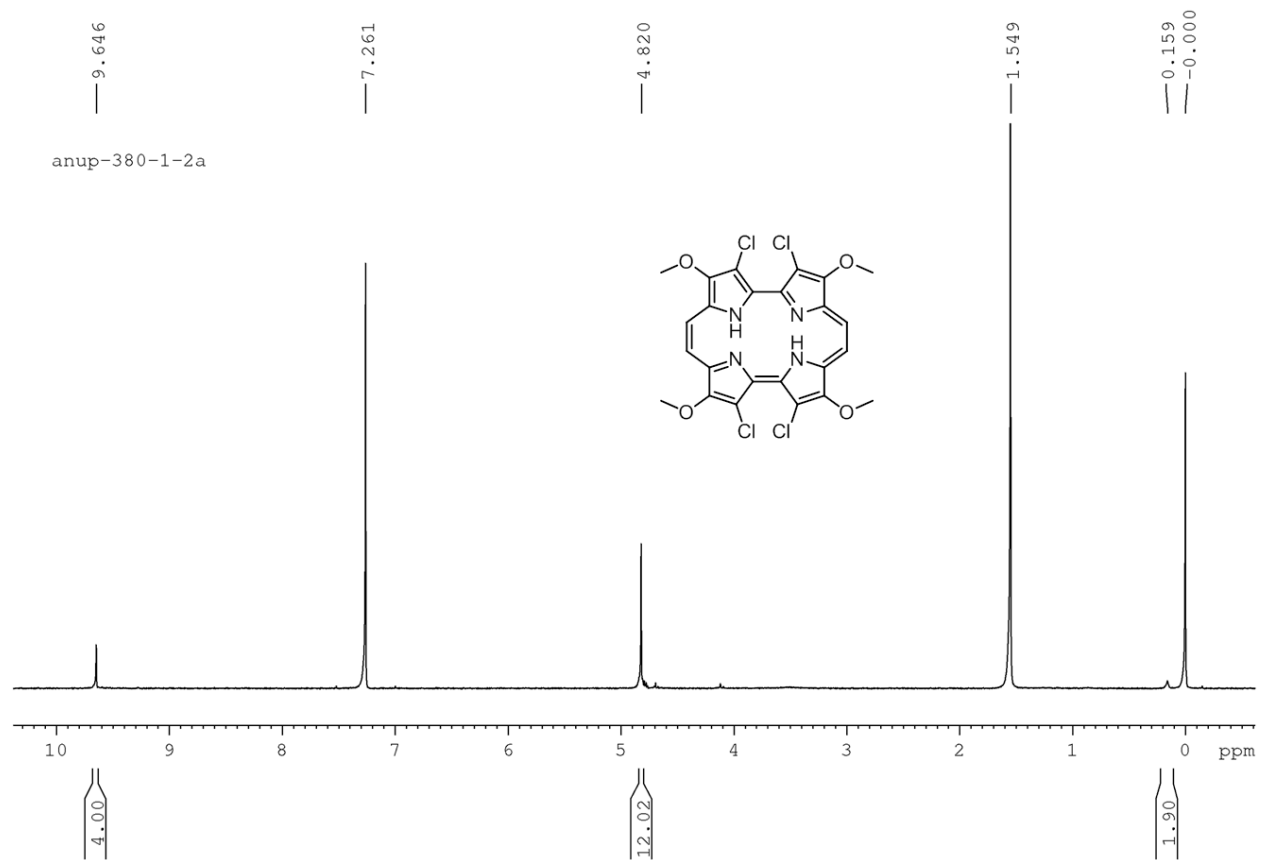

**Figure S20:** <sup>1</sup>H NMR spectrum of **1b** in CDCl<sub>3</sub>.

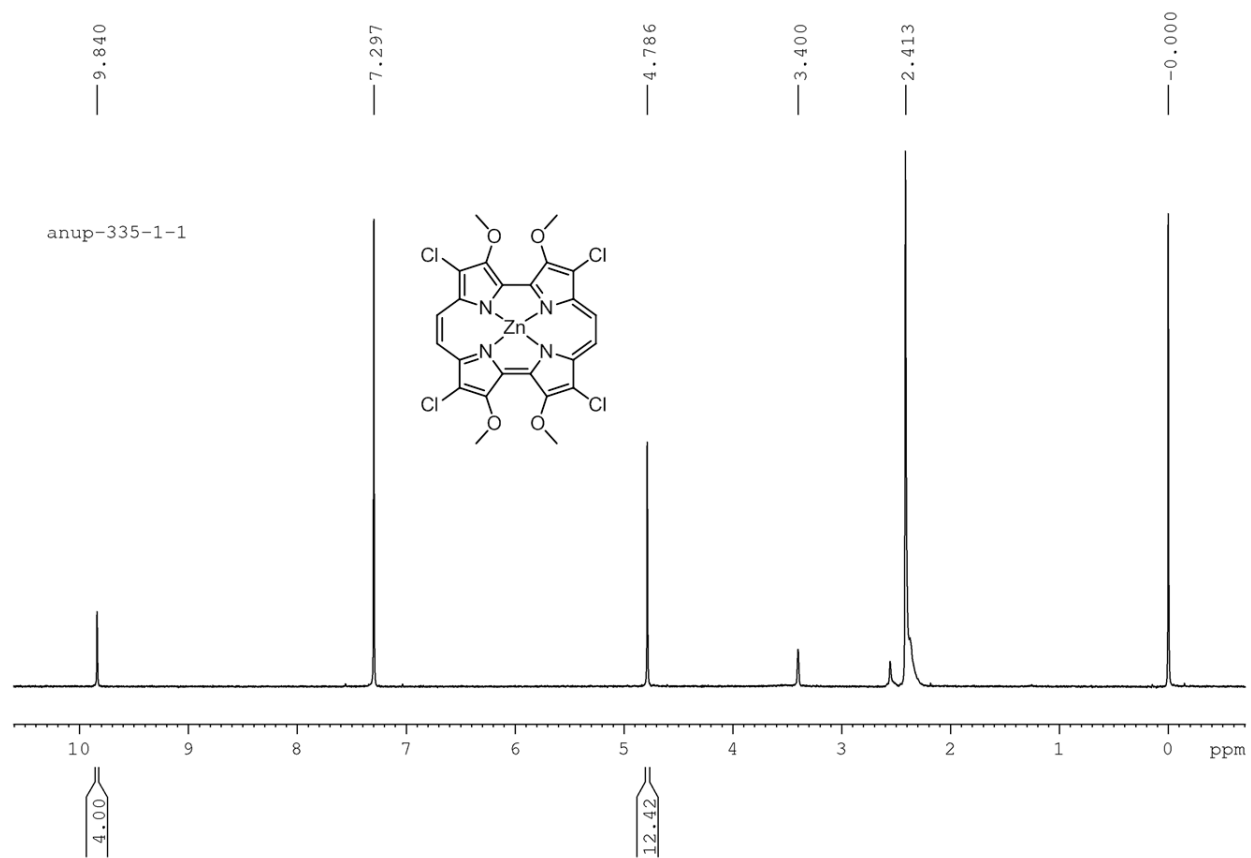

**Figure S21:**  $^1\text{H}$  NMR spectrum of **Zn1a** in  $\text{CDCl}_3$  in presence of small amount of  $\text{CD}_3\text{OD}$ .



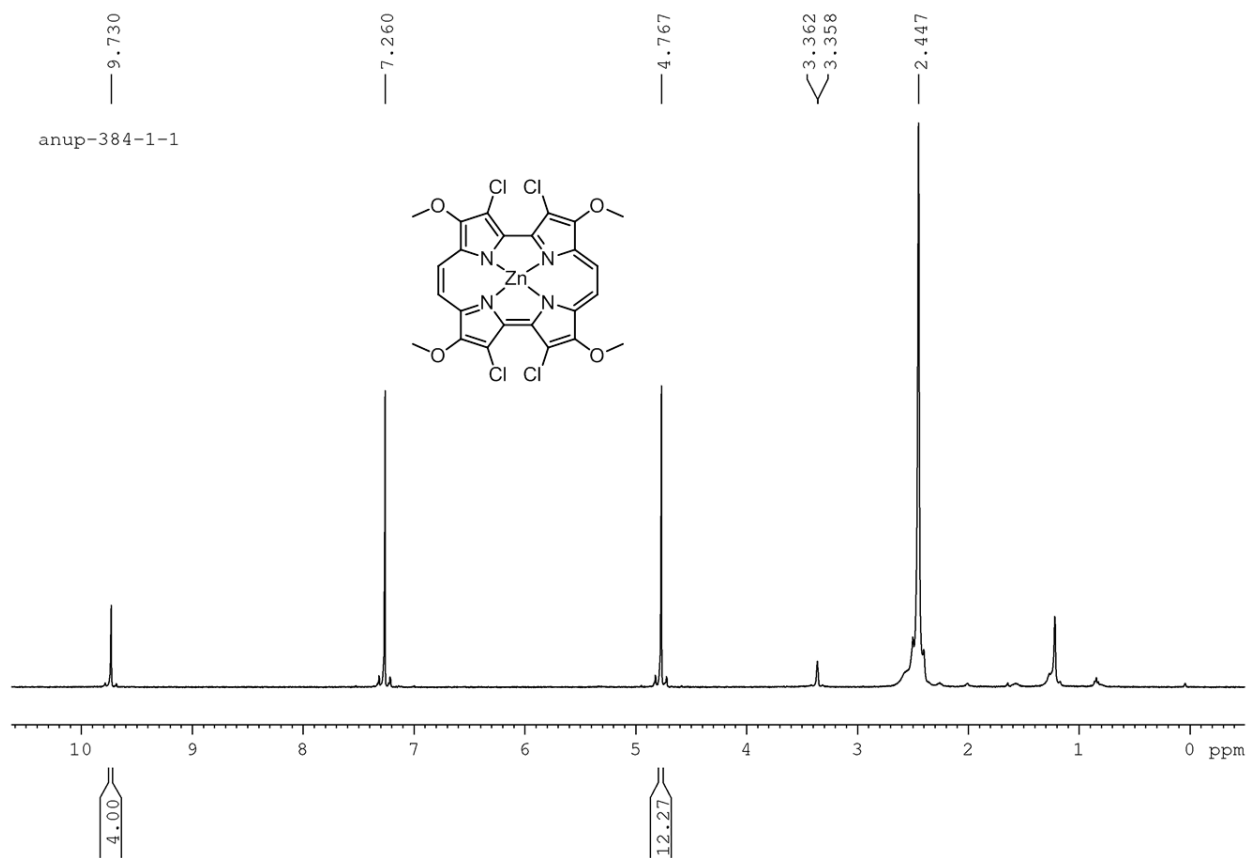

**Figure S22:**  $^1\text{H}$  NMR spectrum of **Zn1b** in  $\text{CDCl}_3$  in presence of small amount of  $\text{CD}_3\text{OD}$ .

### Crystallographic Data:

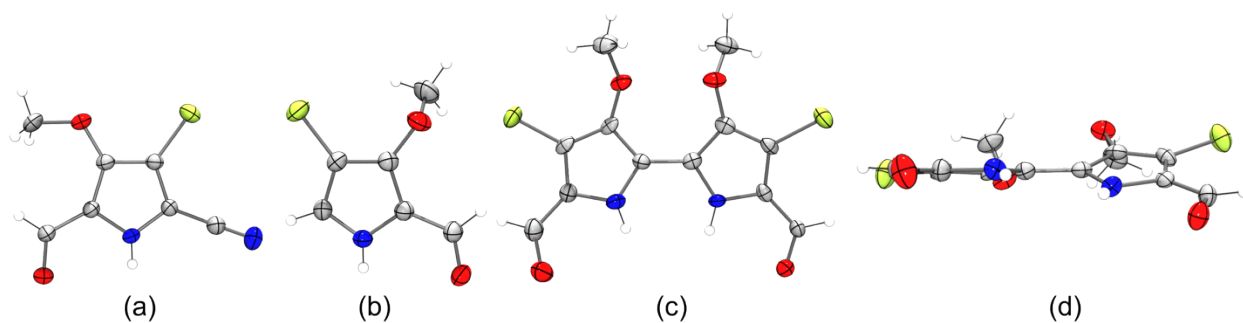

**Figure S23:** Molecular Structure of (a) **8**, (b) **6**, (c) front view **12a** and (d) side view of **12a** scaled in 35% probability level. Color code: C, grey; N, blue; O, red; Cl, yellow green; H, white.

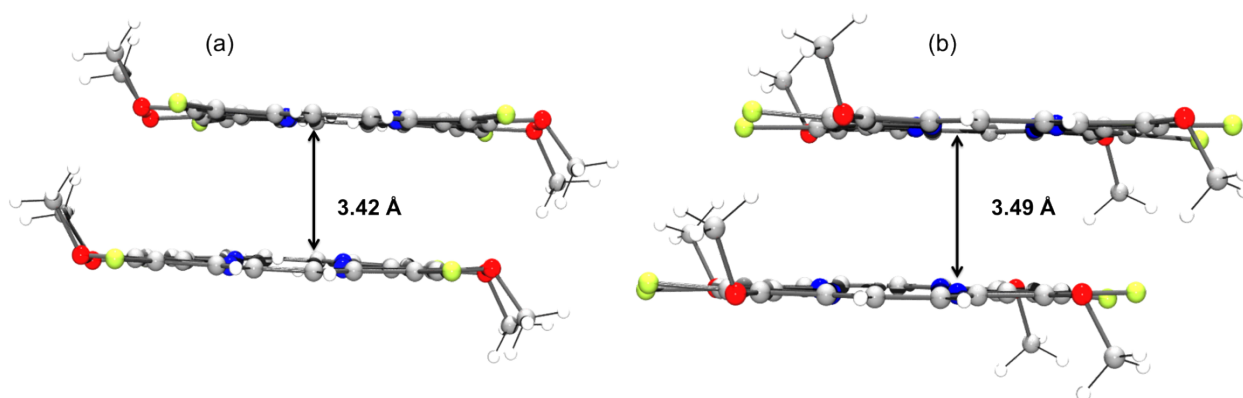

**Figure S24:** Distinctive  $\pi$ - $\pi$ -stacking diagrams of (a) **1a** and (b) **1b**. Color code: C, grey; N, blue; O, red; Cl, yellow green; H, white.

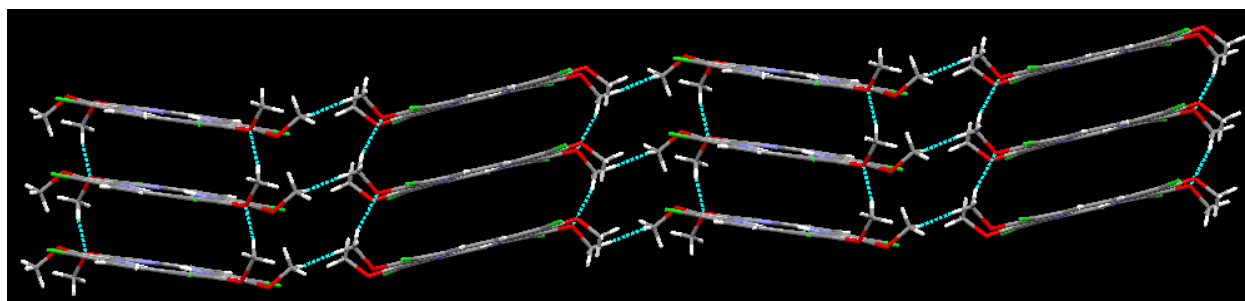

**Figure S25:** Crystal packing diagram of **1a** and short contact represented in cyan color. Color code: C, grey; N, blue; O, red; Cl, green; H, white.

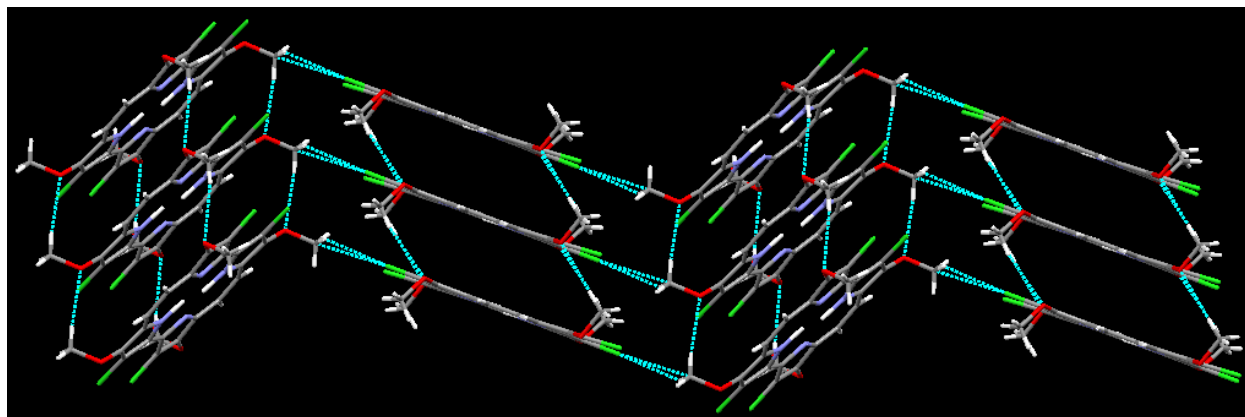

**Figure S26:** Crystal packing diagram of **1b** and short contact represented in cyan color. Color code: C, grey; N, blue; O, red; Cl, green; H, white.

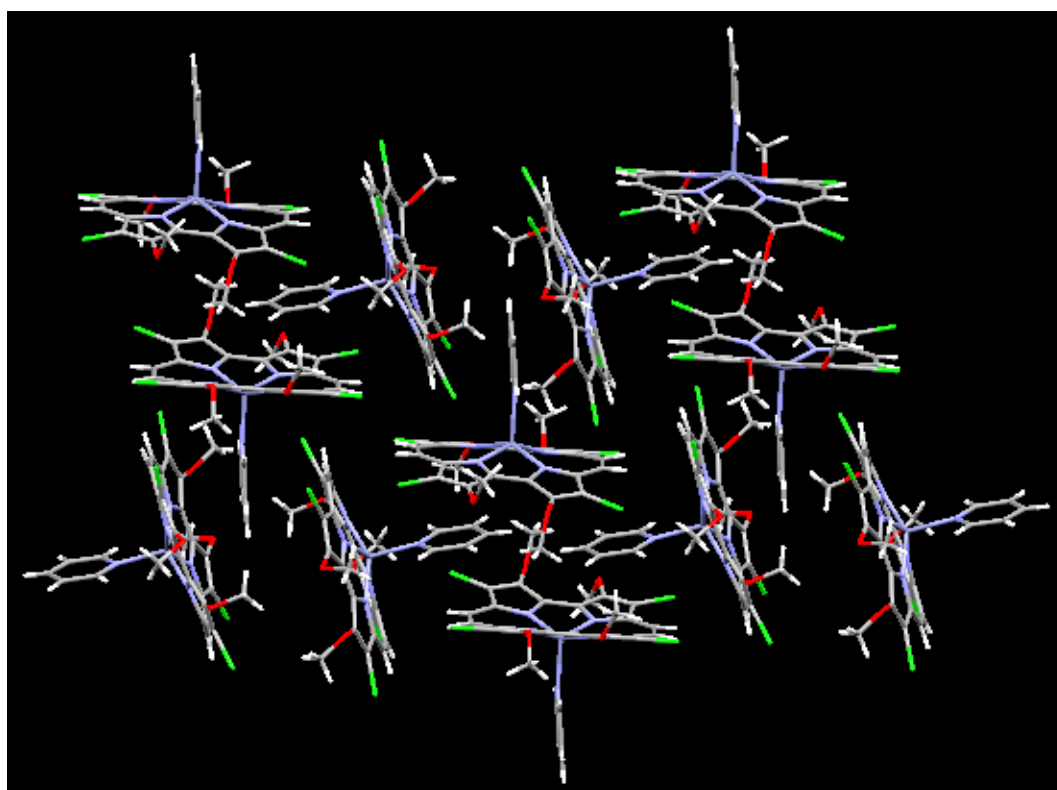

**Figure S27:** Crystal packing diagram of **Zn1a.Py**. Color code: C, grey; N, blue; O, red; Cl, green; H, white; Zn, steel blue.

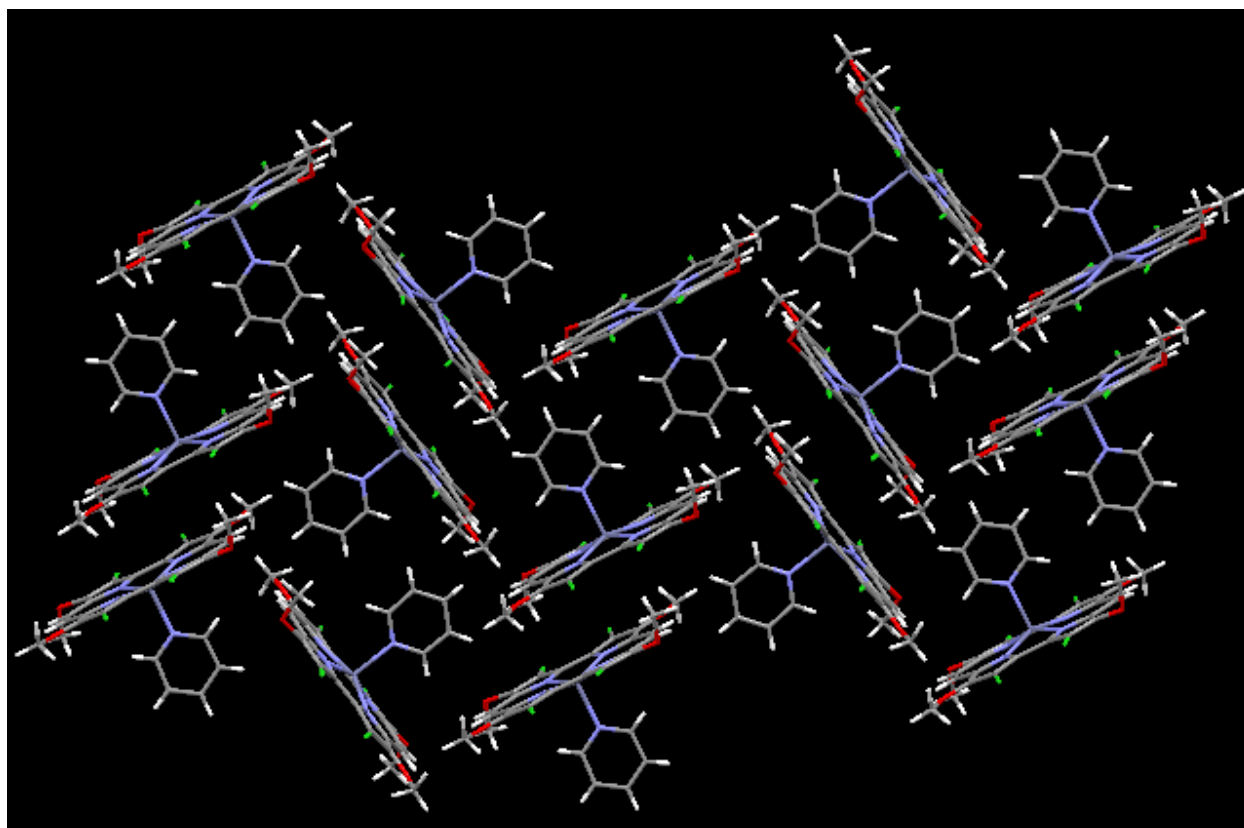

**Figure S28:** Crystal packing diagram of **Zn1b.Py**. Color code: C, grey; N, blue; O, red; Cl, green; H, white; Zn, steel blue.

**Author's comment on IUCR check.cif alert:**

**For 1b:**

PLAT353\_ALERT\_3\_A Long N-H (N0.87,N1.01A) N1 - H1N ... 1.41 Ang.

**Author response:**

This H-atom involves in tautomerisation with opposite N-atom resulted average N-H bond distance.

### Photophysical Data:

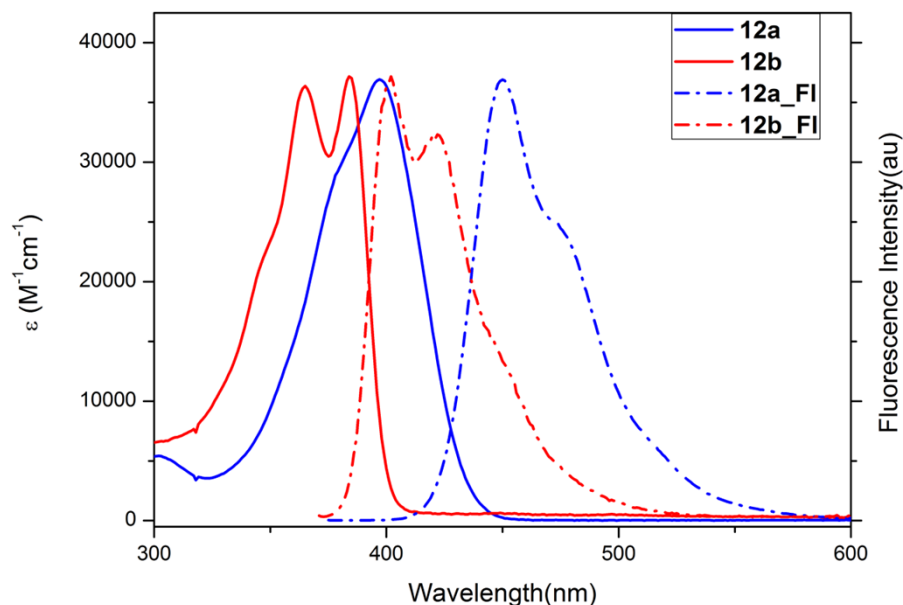

**Figure S29:** UV-Vis (solid line) and fluorescence (dot dash line) spectra of **12a** and **12b** in  $\text{CHCl}_3$  at 25 °C.

**Table S1:** Comparative photophysical data of porphycenes in  $\text{CHCl}_3$  at 25 °C.

| Porphycene<br>s        | UV-Vis (nm, log $\epsilon$ )                               | Emission<br>( $\lambda_{\text{max}}$ ) nm | $\phi_{fa}$ | $\tau_f$<br><sup>b</sup> (ns) | $k_r^c$<br>( $10^8 \text{ s}^{-1}$ ) | $k_{nr}^d$<br>( $10^8 \text{ s}^{-1}$ ) |
|------------------------|------------------------------------------------------------|-------------------------------------------|-------------|-------------------------------|--------------------------------------|-----------------------------------------|
| <b>1a</b>              | 376 (5.16), 384 (5.14), 565 (4.58), 608 (4.35), 647 (4.52) | 655, 717                                  | 0.00071     | ---                           | ---                                  | ---                                     |
| <b>Zn1a</b>            | 391 (5.24), 588 (4.33), 638 (4.90)                         | 645, 706                                  | 0.17        | 2.9                           | 0.59                                 | 2.86                                    |
| <b>Pd1a</b>            | 389(4.94), 561 (4.14), 606 (4.70)                          | ---                                       | ---         | ---                           | ---                                  | ---                                     |
| <b>1b</b>              | 385 (5.13), 572 (4.52), 625 (4.31), 664 (4.46)             | 672                                       | 0.00075     | ---                           | ---                                  | ---                                     |
| <b>Zn1b</b>            | 391(4.90), 604 (4.14), 638 (4.61)                          | 654, 711                                  | 0.16        | 2.2                           | 0.73                                 | 3.82                                    |
| <b>Pd1b</b>            | 391(4.93), 603 (4.64), 624 (4.55)                          | ---                                       | ---         | ---                           | ---                                  | ---                                     |
| <b>2<sup>e</sup></b>   | 382 (5.09), 557 (4.40), 599 (4.24), 636 (4.34)             | 649                                       | <0.0001     | ---                           | ---                                  | ---                                     |
| <b>Zn2<sup>e</sup></b> | 390 (5.08), 618 (4.75)                                     | 632, 689                                  | 0.025       | 0.6                           | 0.42                                 | 16.25                                   |
| <b>Pd2<sup>e</sup></b> | 390 (4.84), 590 (4.48)                                     | ---                                       | ---         | ---                           | ---                                  | ---                                     |

<sup>a</sup> fluorescence quantum yield measured by comparative actinometry method by using **H<sub>2</sub>TPP** in toluene ( $\phi_f$  0.11) as standard, <sup>b</sup> fluorescence lifetime, <sup>c</sup> radiative rate constant ( $\phi_f/\tau_f$ ), <sup>d</sup> non-radiative rate constant ( $(1 - \phi_f)/\tau_f$ ), <sup>e</sup> taken from ref no. S8.

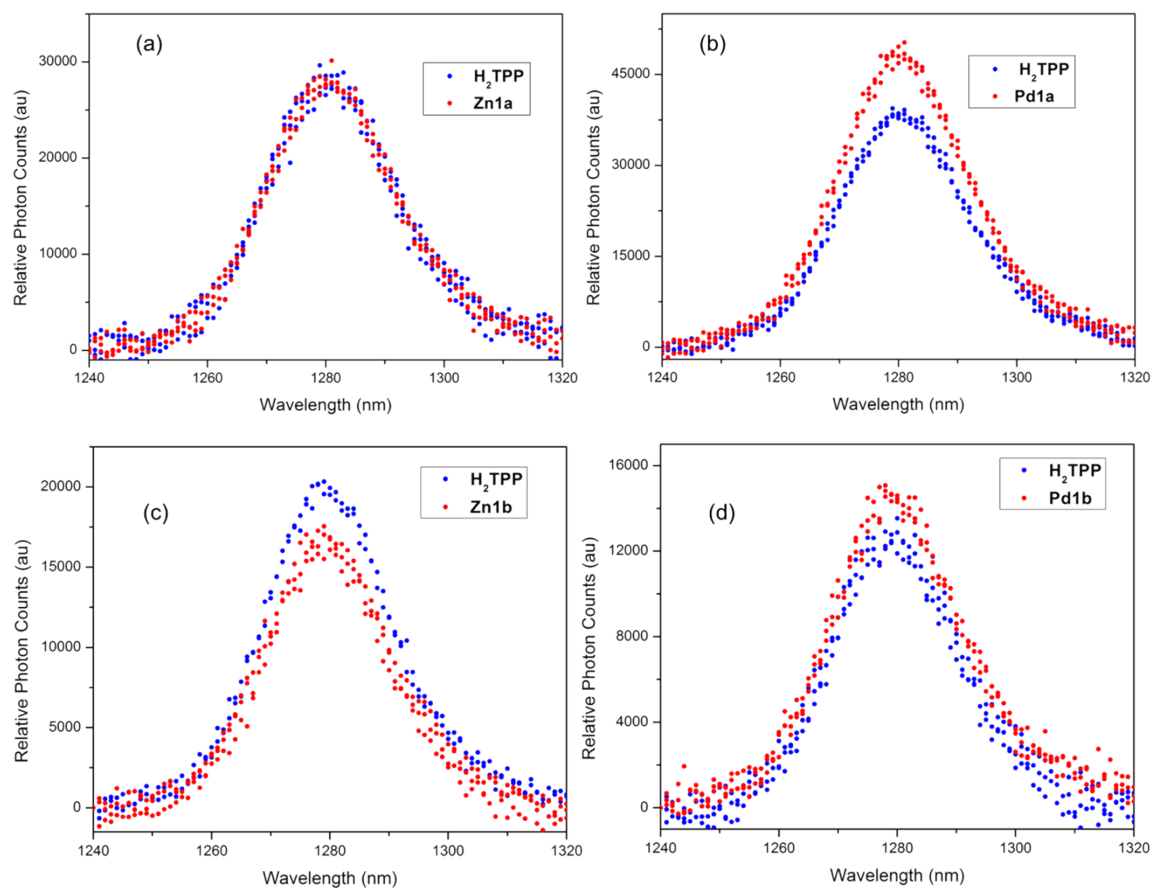

**Figure S30:** Singlet oxygen luminescence of optically matched (a) **H<sub>2</sub>TPP** and **Zn1a** (b) **H<sub>2</sub>TPP** and **Pd1a** (c) **H<sub>2</sub>TPP** and **Zn1b** (d) **H<sub>2</sub>TPP** and **Pd1b** in air saturated toluene at 25 °C.

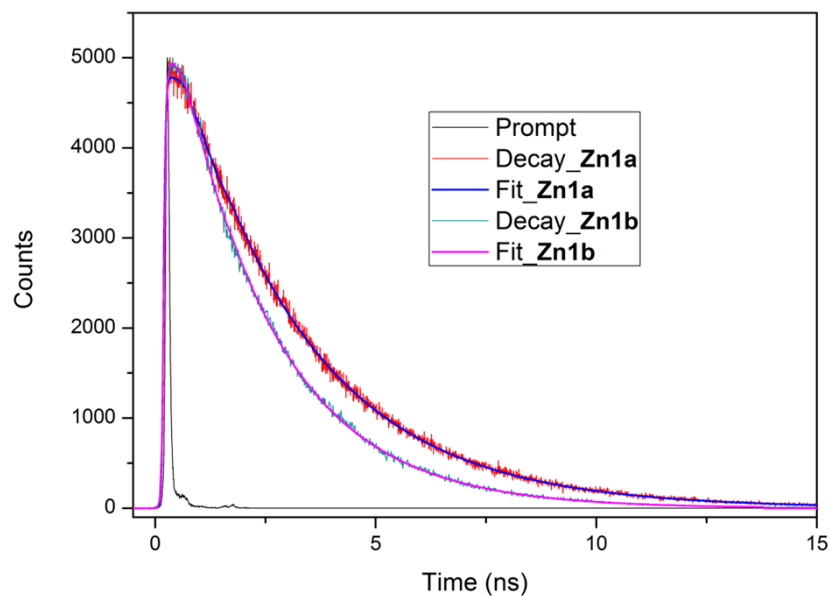

**Figure S31:** Fluorescence decay profiles of **Zn1a** and **Zn1b** in  $\text{CHCl}_3$  at 25 °C.

**Electrochemical Data:**

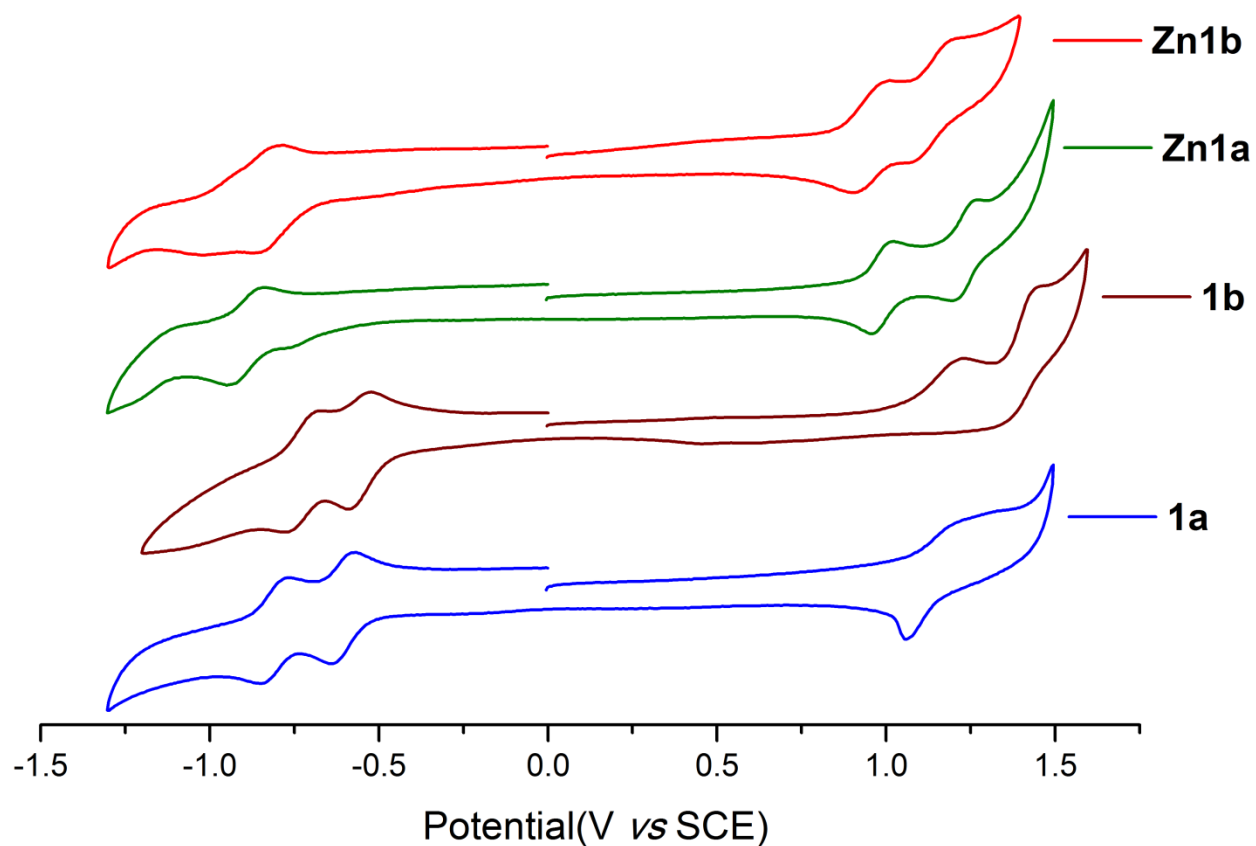

**Figure S32:** Cyclic voltammograms of **1a**, **1b** and their Zn(II) complexes in dichloromethane at 25 °C (scan rate 50 mV/s).

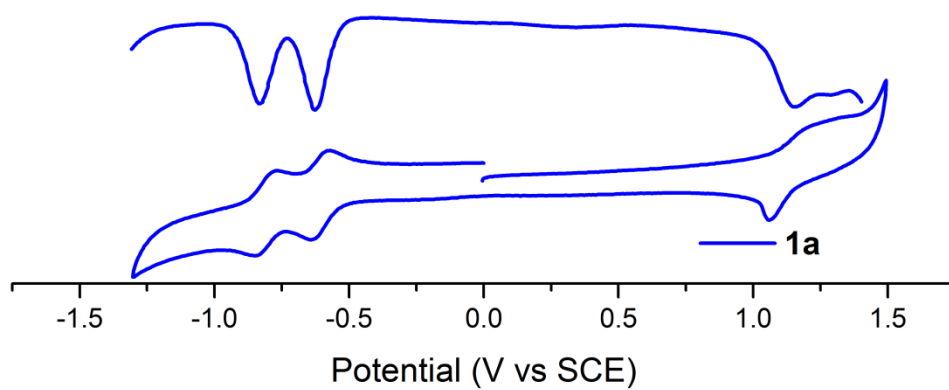

**Figure S33:** Combined CV (below) and DPV (above) of **1a** in dichloromethane measured at 25 °C.

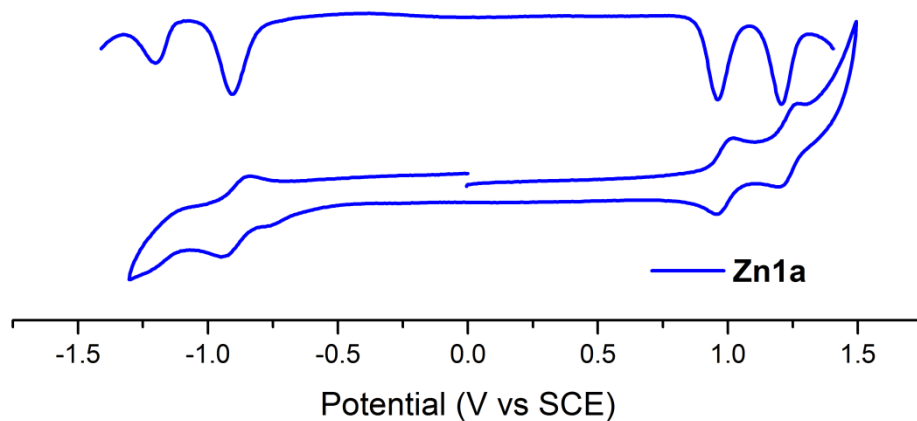

**Figure S34:** Combined CV (below) and DPV (above) of **Zn1a** in dichloromethane measured at 25 °C.

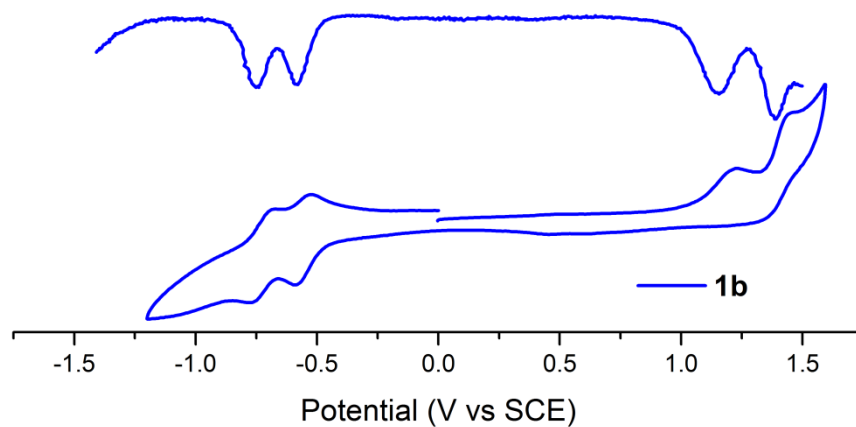

**Figure S35:** Combined CV (below) and DPV (above) of **1b** in dichloromethane measured at 25 °C.

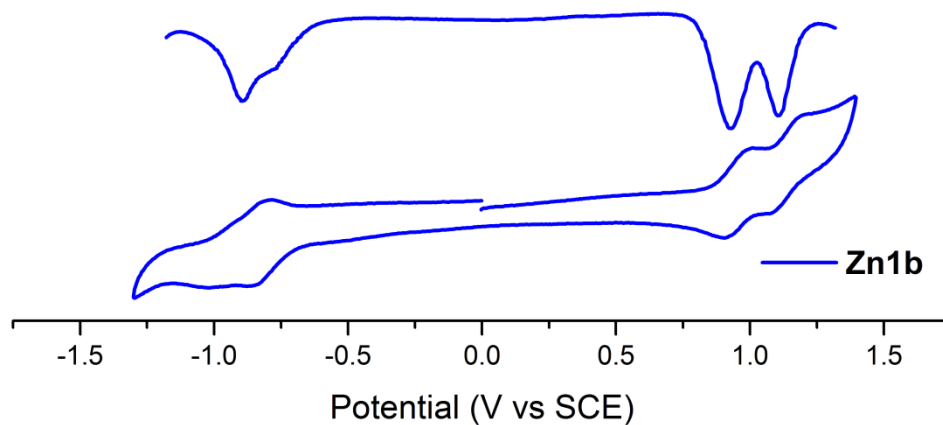

**Figure S36:** Combined CV (below) and DPV (above) of **Zn1b** in dichloromethane measured at 25 °C.



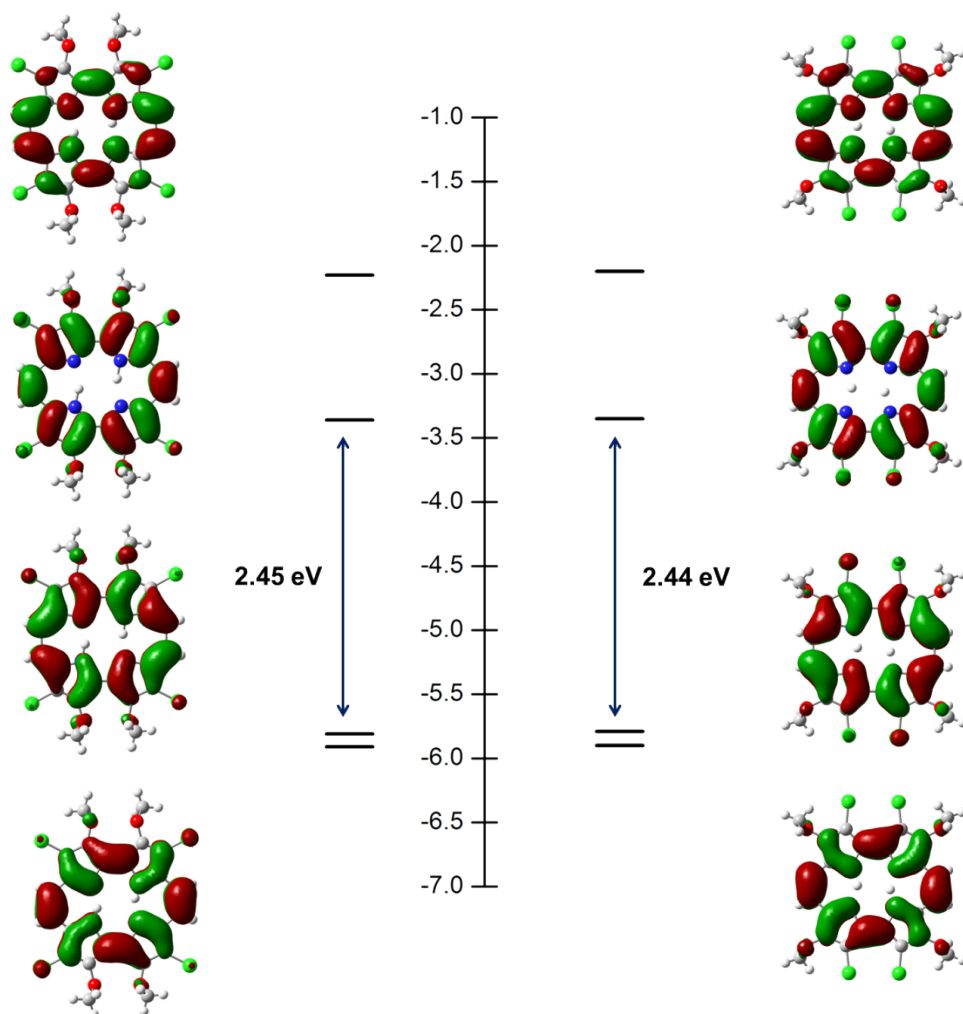

**Figure S37:** Molecular orbitals of **1a** (left) and **1b** obtained by single point calculation of crystal structure by using B3LYP (6-31+G) method.

**Cartesian coordinates for the DFT optimized geometry:**

**For 1a:**

| Tag | Symbol | X         | Y         | Z          |
|-----|--------|-----------|-----------|------------|
| 1   | Cl     | 0.2320920 | 3.8247630 | 4.4107670  |
| 2   | Cl     | 0.2720600 | 3.8348530 | -4.3984040 |
| 3   | N      | 0.0530050 | 1.3572160 | -1.3832030 |
| 4   | N      | 0.1642910 | 1.3494690 | 1.3948810  |

|    |   |            |           |            |
|----|---|------------|-----------|------------|
| 5  | O | 0.2745210  | 4.9250970 | 1.3989820  |
| 6  | C | 0.0373890  | 1.6199630 | -2.7284110 |
| 7  | C | 0.2210930  | 3.6029950 | -1.6536710 |
| 8  | C | 0.2099300  | 3.0107710 | 2.8875620  |
| 9  | C | 0.1580030  | 2.5316730 | -0.7030520 |
| 10 | O | 0.4137020  | 4.9120100 | -1.3431320 |
| 11 | C | 0.1246030  | 0.6732220 | 3.7769520  |
| 12 | H | 0.1531320  | 1.0540420 | 4.6249020  |
| 13 | C | 0.1622600  | 1.5928780 | 2.7291030  |
| 14 | C | 0.1733760  | 2.5243160 | 0.7149830  |
| 15 | C | 0.1680090  | 3.0416730 | -2.8686630 |
| 16 | C | 0.2121940  | 3.5976270 | 1.6694960  |
| 17 | C | -0.0531230 | 0.6981530 | -3.7712760 |
| 18 | H | -0.0668850 | 1.0821440 | -4.6181420 |
| 19 | C | -0.8843080 | 5.6693670 | 1.7715640  |
| 20 | H | -1.6529830 | 5.3127950 | 1.3176960  |
| 21 | H | -0.7663490 | 6.5889300 | 1.5273530  |
| 22 | H | -1.0165570 | 5.6046090 | 2.7194970  |
| 23 | C | -0.6099740 | 5.8075830 | -1.7473490 |
| 24 | H | -0.6979420 | 5.7829610 | -2.7019830 |
| 25 | H | -0.3821910 | 6.7000370 | -1.4700150 |
| 26 | H | -1.4403400 | 5.5499170 | -1.3414730 |

|    |    |            |            |            |
|----|----|------------|------------|------------|
| 27 | H  | -0.1014140 | 0.2882490  | -1.1575980 |
| 28 | Cl | -0.2320920 | -3.8247630 | -4.4107670 |
| 29 | Cl | -0.2720600 | -3.8348530 | 4.3984040  |
| 30 | N  | -0.0530050 | -1.3572160 | 1.3832030  |
| 31 | N  | -0.1642910 | -1.3494690 | -1.3948810 |
| 32 | O  | -0.2745210 | -4.9250970 | -1.3989820 |
| 33 | C  | -0.0373890 | -1.6199630 | 2.7284110  |
| 34 | C  | -0.2210930 | -3.6029950 | 1.6536710  |
| 35 | C  | -0.2099300 | -3.0107710 | -2.8875620 |
| 36 | C  | -0.1580030 | -2.5316730 | 0.7030520  |
| 37 | O  | -0.4137020 | -4.9120100 | 1.3431320  |
| 38 | C  | -0.1246030 | -0.6732220 | -3.7769520 |
| 39 | H  | -0.1531320 | -1.0540420 | -4.6249020 |
| 40 | C  | -0.1622600 | -1.5928780 | -2.7291030 |
| 41 | C  | -0.1733760 | -2.5243160 | -0.7149830 |
| 42 | C  | -0.1680090 | -3.0416730 | 2.8686630  |
| 43 | C  | -0.2121940 | -3.5976270 | -1.6694960 |
| 44 | C  | 0.0531230  | -0.6981530 | 3.7712760  |
| 45 | H  | 0.0668850  | -1.0821440 | 4.6181420  |
| 46 | C  | 0.8843080  | -5.6693670 | -1.7715640 |
| 47 | H  | 1.6529830  | -5.3127950 | -1.3176960 |
| 48 | H  | 0.7663490  | -6.5889300 | -1.5273530 |

|    |   |           |            |            |
|----|---|-----------|------------|------------|
| 49 | H | 1.0165570 | -5.6046090 | -2.7194970 |
| 50 | C | 0.6099740 | -5.8075830 | 1.7473490  |
| 51 | H | 0.6979420 | -5.7829610 | 2.7019830  |
| 52 | H | 0.3821910 | -6.7000370 | 1.4700150  |
| 53 | H | 1.4403400 | -5.5499170 | 1.3414730  |
| 54 | H | 0.1014140 | -0.2882490 | 1.1575980  |

**For 1b:**

| Tag | Symbol | X          | Y         | Z          |
|-----|--------|------------|-----------|------------|
| 1   | Cl     | -0.3366640 | 5.3217910 | -1.5026490 |
| 2   | Cl     | -0.1680910 | 5.3154060 | 1.6072990  |
| 3   | O      | -0.2312510 | 3.5625070 | 4.1664140  |
| 4   | N      | -0.0588660 | 1.3936670 | -1.3690830 |
| 5   | N      | -0.1246280 | 1.3660530 | 1.3551540  |
| 6   | O      | -0.2181360 | 3.6393720 | -4.1243600 |
| 7   | C      | -0.1792610 | 3.6079990 | 1.7396800  |
| 8   | C      | -0.1237710 | 0.6588440 | 3.7487050  |
| 9   | H      | -0.1756080 | 1.0405800 | 4.5965800  |
| 10  | C      | -0.0577480 | 1.6425960 | -2.7105050 |
| 11  | C      | -0.2070420 | 3.6226220 | -1.6765740 |
| 12  | C      | -0.1513430 | 3.0475990 | -2.8964160 |
| 13  | C      | -0.1456260 | 2.5887580 | -0.6863150 |
| 14  | C      | -0.1579540 | 2.5703460 | 0.7195930  |

|    |    |            |            |            |
|----|----|------------|------------|------------|
| 15 | C  | -0.1501440 | 1.5838810  | 2.7038310  |
| 16 | C  | -0.1802840 | 2.9945450  | 2.9355630  |
| 17 | C  | -0.0344070 | -0.7138630 | 3.7540520  |
| 18 | H  | -0.0354690 | -1.0937050 | 4.6020890  |
| 19 | C  | 1.0178640  | 4.0702350  | 4.6495720  |
| 20 | H  | 1.6649310  | 3.3613990  | 4.6690330  |
| 21 | H  | 0.9004490  | 4.4211660  | 5.5352600  |
| 22 | H  | 1.3248870  | 4.7679990  | 4.0674860  |
| 23 | C  | 0.9642960  | 4.3386690  | -4.5211390 |
| 24 | H  | 1.1253570  | 5.0659710  | -3.9148430 |
| 25 | H  | 0.8496860  | 4.6826460  | -5.4106250 |
| 26 | H  | 1.7124280  | 3.7367860  | -4.5050620 |
| 27 | H  | -0.1020860 | 0.1210550  | 1.0177070  |
| 28 | Cl | 0.3366640  | -5.3217910 | 1.5026490  |
| 29 | Cl | 0.1680910  | -5.3154060 | -1.6072990 |
| 30 | O  | 0.2312510  | -3.5625070 | -4.1664140 |
| 31 | N  | 0.0588660  | -1.3936670 | 1.3690830  |
| 32 | N  | 0.1246280  | -1.3660530 | -1.3551540 |
| 33 | O  | 0.2181360  | -3.6393720 | 4.1243600  |
| 34 | C  | 0.1792610  | -3.6079990 | -1.7396800 |
| 35 | C  | 0.1237710  | -0.6588440 | -3.7487050 |
| 36 | H  | 0.1756080  | -1.0405800 | -4.5965800 |

|    |   |            |            |            |
|----|---|------------|------------|------------|
| 37 | C | 0.0577480  | -1.6425960 | 2.7105050  |
| 38 | C | 0.2070420  | -3.6226220 | 1.6765740  |
| 39 | C | 0.1513430  | -3.0475990 | 2.8964160  |
| 40 | C | 0.1456260  | -2.5887580 | 0.6863150  |
| 41 | C | 0.1579540  | -2.5703460 | -0.7195930 |
| 42 | C | 0.1501440  | -1.5838810 | -2.7038310 |
| 43 | C | 0.1802840  | -2.9945450 | -2.9355630 |
| 44 | C | 0.0344070  | 0.7138630  | -3.7540520 |
| 45 | H | 0.0354690  | 1.0937050  | -4.6020890 |
| 46 | C | -1.0178640 | -4.0702350 | -4.6495720 |
| 47 | H | -1.6649310 | -3.3613990 | -4.6690330 |
| 48 | H | -0.9004490 | -4.4211660 | -5.5352600 |
| 49 | H | -1.3248870 | -4.7679990 | -4.0674860 |
| 50 | C | -0.9642960 | -4.3386690 | 4.5211390  |
| 51 | H | -1.1253570 | -5.0659710 | 3.9148430  |
| 52 | H | -0.8496860 | -4.6826460 | 5.4106250  |
| 53 | H | -1.7124280 | -3.7367860 | 4.5050620  |
| 54 | H | 0.1020860  | -0.1210550 | -1.0177070 |

## References:

- S1. X. F. Zhang, J. Huang, Q. Xi and Y. Wang, *Aust. J. Chem.*, 2010, **63**, 1471; S. Mathai, T. A. Smith and K. P. Ghiggino, *Photochem. Photobiol. Sci.*, 2007, **6**, 995.
- S2. Oxford Diffraction (2008). CrysAlis CCD and CrysAlis RED. Versions 1.171.33.55. Oxford Diffraction Ltd, Yarnton, Oxfordshire, England.
- S3. (a) A. L. Spek, *PLATON, A Multipurpose Crystallographic Tool*, Utrecht University, Utrecht, The Netherlands, 2002; (b) A. L. Spek, *J. Appl. Cryst.*, 2003, **36**, 7.
- S4. SAINT, version 6.45 /8/6/03, Bruker AXS, 2003.
- S5. G. M. Sheldrick, *SADABS*, Program for Empirical Absorption Correction of Area Detector Data, University of Göttingen, Germany, 1997.
- S6. G. M. Sheldrick, *SHELXS-97* and *SHELXL-97*, Programs for the Solution and Refinement of Crystal Structures, University of Göttingen, Germany, 1997.
- S7. (Reference 15 in manuscript): Gaussian 09, Revision C.01, M. J. Frisch, G. W. Trucks, H. B. Schlegel, G. E. Scuseria, M. A. Robb, J. R. Cheeseman, G. Scalmani, V. Barone, B. Mennucci, G. A. Petersson, H. Nakatsuji, M. Caricato, X. Li, H. P. Hratchian, A. F. Izmaylov, J. Bloino, G. Zheng, J. L. Sonnenberg, M. Hada, M. Ehara, K. Toyota, R. Fukuda, J. Hasegawa, M. Ishida, T. Nakajima, Y. Honda, O. Kitao, H. Nakai, T. Vreven, J. A. Montgomery Jr., J. E. Peralta, F. Ogliaro, M. Bearpark, J. J. Heyd, E. Brothers, K. N. Kudin, V. N. Staroverov, T. Keith, R. Kobayashi, J. Normand, K. Raghavachari, A. Rendell, J. C. Burant, S. S. Iyengar, J. Tomasi, M. Cossi, N. Rega, J. M. Millam, M. Klene, J. E. Knox, J. B. Cross, V. Bakken, C. Adamo, J. Jaramillo, R. Gomperts, R. E. Stratmann, O. Yazyev, A. J. Austin, R. Cammi, C. Pomelli, J. W. Ochterski, R. L. Martin, K. Morokuma, V. G. Zakrzewski, G. A. Voth, P. Salvador, J. J. Dannenberg, S. Dapprich, A. D. Daniels, O. Farkas, J. B. Foresman, J. V. Ortiz, J. Cioslowski, D. J. Fox, Gaussian, Inc., Wallingford CT, 2010.
- S8. A. Rana and P. K. Panda, *Org. Lett.*, 2014, **16**, 78.
